# Supplementary material for: Structural diversity of terpenoids in the soft coral Sinularia flexibilis, evidenced by a collection from the South China Sea
Source: Royal Society of Chemistry journal article supplement (doi:10.1039/c5ra01151e), 2015-01-01
Supplement: c5ra01151e1.pdf [file c5ra01151e1.pdf]

## Supplementary Information

### Structural diversity of terpenoids in the Soft Coral *Sinularia flexibilis*, evidence by a collection from the South China Sea

*Wen-Ting Chen, Jia Li, Jian-Rong Wang, Xu-Wen Li\**, *Yue-Wei Guo\**

State Key Laboratory of Drug Research, Shanghai Institute of Materia Medica, Chinese Academy of Sciences, 555 Zu Chong Zhi Road, Zhang Jiang High-Tech Park, Shanghai, 201203, People's Republic of China

\* To whom correspondence should be addressed. Tel./fax: +86-21-50805813; e-mail: [ywguo@simm.ac.cn](mailto:ywguo@simm.ac.cn) (Y.-W. Guo) & [xuwen.li@org.chem.ethz.ch](mailto:xuwen.li@org.chem.ethz.ch) (X.-W. Li)

## CONTENTS

- Figure S1.**  $^1\text{H}$  NMR spectrum (500 MHz,  $\text{CDCl}_3$ ) of 9 $\alpha$ -hydroxy-flexibilide (**1**)
- Figure S2.**  $^{13}\text{C}$  NMR spectrum (125 MHz,  $\text{CDCl}_3$ ) of 9 $\alpha$ -hydroxy-flexibilide (**1**)
- Figure S3.** HMQC spectrum (500 MHz,  $\text{CDCl}_3$ ) of 9 $\alpha$ -hydroxy-flexibilide (**1**)
- Figure S4.** HMBC spectrum (500 MHz,  $\text{CDCl}_3$ ) of 9 $\alpha$ -hydroxy-flexibilide (**1**)
- Figure S5.**  $^1\text{H}$ - $^1\text{H}$  COSY spectrum (500 MHz,  $\text{CDCl}_3$ ) of 9 $\alpha$ -hydroxy-flexibilide (**1**)
- Figure S6.** ROESY spectrum (500 MHz,  $\text{CDCl}_3$ ) of 9 $\alpha$ -hydroxy-flexibilide (**1**)
- Figure S7.** HRESIMS spectrum of 9 $\alpha$ -hydroxy-flexibilide (**1**)
- Figure S8.**  $^1\text{H}$  NMR spectrum (400 MHz,  $\text{CDCl}_3$ ) of 15(17)-dehydromanaarenolide E (**2**)
- Figure S9.**  $^{13}\text{C}$  NMR spectrum (100 MHz,  $\text{CDCl}_3$ ) of 15(17)-dehydromanaarenolide E (**2**)
- Figure S10.** HRESIMS spectrum of 15(17)-dehydromanaarenolide E (**2**)
- Figure S11.**  $^1\text{H}$  NMR spectrum (500 MHz,  $\text{CDCl}_3$ ) of 8-dehydroxy-15(17)-dehydromanaarenolide E (**3**)
- Figure S12.**  $^{13}\text{C}$  NMR spectrum (125 MHz,  $\text{CDCl}_3$ ) of 8-dehydroxy-15(17)-dehydromanaarenolide E (**3**)
- Figure S13.** HMQC spectrum (500 MHz,  $\text{CDCl}_3$ ) of 8-dehydroxy-15(17)-dehydromanaarenolide E (**3**)
- Figure S14.** HMBC spectrum (500 MHz,  $\text{CDCl}_3$ ) of 8-dehydroxy-15(17)-dehydromanaarenolide E (**3**)
- Figure S15.**  $^1\text{H}$ - $^1\text{H}$  COSY spectrum (500 MHz,  $\text{CDCl}_3$ ) of 8-dehydroxy-15(17)-dehydromanaarenolide E (**3**)
- Figure S16.** HRESIMS spectrum of 8-dehydroxy-15(17)-dehydromanaarenolide E (**3**)

- Figure S17.**  $^1\text{H}$  NMR spectrum (400 MHz,  $\text{CDCl}_3$ ) of 15,17-dedihydromanaarenolide A (4)
- Figure S18.**  $^{13}\text{C}$  NMR spectrum (100 MHz,  $\text{CDCl}_3$ ) of 15,17-dedihydromanaarenolide A (4)
- Figure S19.** HRESIMS spectrum of 15,17-dedihydromanaarenolide A (4)
- Figure S20.**  $^1\text{H}$  NMR spectrum (400 MHz,  $\text{CDCl}_3$ ) of 15,17-dedihydromanaarenolide C (5)
- Figure S21.**  $^{13}\text{C}$  NMR spectrum (100 MHz,  $\text{CDCl}_3$ ) of 15,17-dedihydromanaarenolide C (5)
- Figure S22.** HRESIMS spectrum of 15,17-dedihydromanaarenolide C (5)
- Figure S23.**  $^1\text{H}$  NMR spectrum (400 MHz,  $\text{CDCl}_3$ ) of *epi*-flexilarin A (6)
- Figure S24.** HRESIMS spectrum of *epi*-flexilarin A (6)
- Figure S25.**  $^1\text{H}$  NMR spectrum (500 MHz,  $\text{CDCl}_3$ ) of epoxyflexibilene (7)
- Figure S26.**  $^{13}\text{C}$  NMR spectrum (125 MHz,  $\text{CDCl}_3$ ) of epoxyflexibilene (7)
- Figure S27.** HMQC spectrum (500 MHz,  $\text{CDCl}_3$ ) of epoxyflexibilene (7)
- Figure S28.** HMBC spectrum (500 MHz,  $\text{CDCl}_3$ ) of epoxyflexibilene (7)
- Figure S29.**  $^1\text{H}$ - $^1\text{H}$  COSY spectrum (500 MHz,  $\text{CDCl}_3$ ) of epoxyflexibilene (7)
- Figure S30.** HREIMS spectrum of epoxyflexibilene (7)
- Figure S31.**  $^1\text{H}$  NMR spectrum (500 MHz,  $\text{Pyr-d}_5$ ) of sinulaflexiolide L (8)
- Figure S32.**  $^{13}\text{C}$  NMR spectrum (125 MHz,  $\text{Pyr-d}_5$ ) of sinulaflexiolide L (8)
- Figure S33.** HMQC spectrum (500 MHz,  $\text{Pyr-d}_5$ ) of sinulaflexiolide L (8)
- Figure S34.** HMBC spectrum (500 MHz,  $\text{Pyr-d}_5$ ) of sinulaflexiolide L (8)
- Figure S35.**  $^1\text{H}$ - $^1\text{H}$  COSY spectrum (500 MHz,  $\text{Pyr-d}_5$ ) of sinulaflexiolide L (8)

**Figure S36.** HRESIMS spectrum of sinulaflexiolide L (**8**)

**Figure S1.**  $^1\text{H}$  NMR spectrum (400 MHz,  $\text{CDCl}_3$ ) of 9 $\alpha$ -hydroxy-flexibilide (**1**).

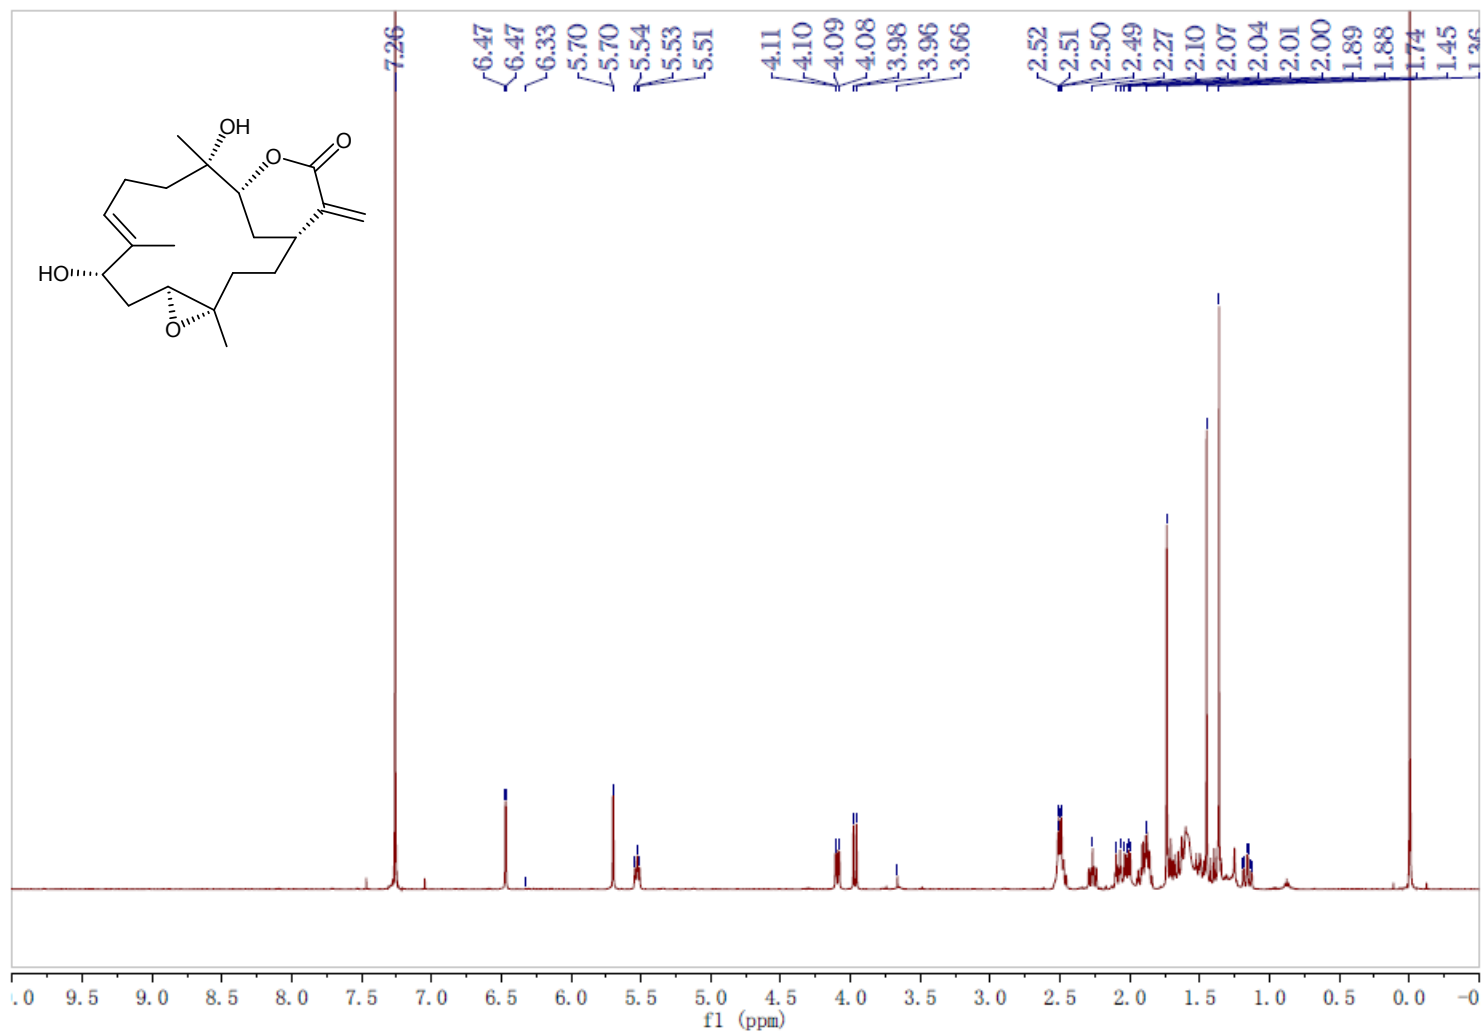

**Figure S2.**  $^{13}\text{C}$  NMR spectrum (100 MHz,  $\text{CDCl}_3$ ) of 9 $\alpha$ -hydroxy-flexibilide (**1**).

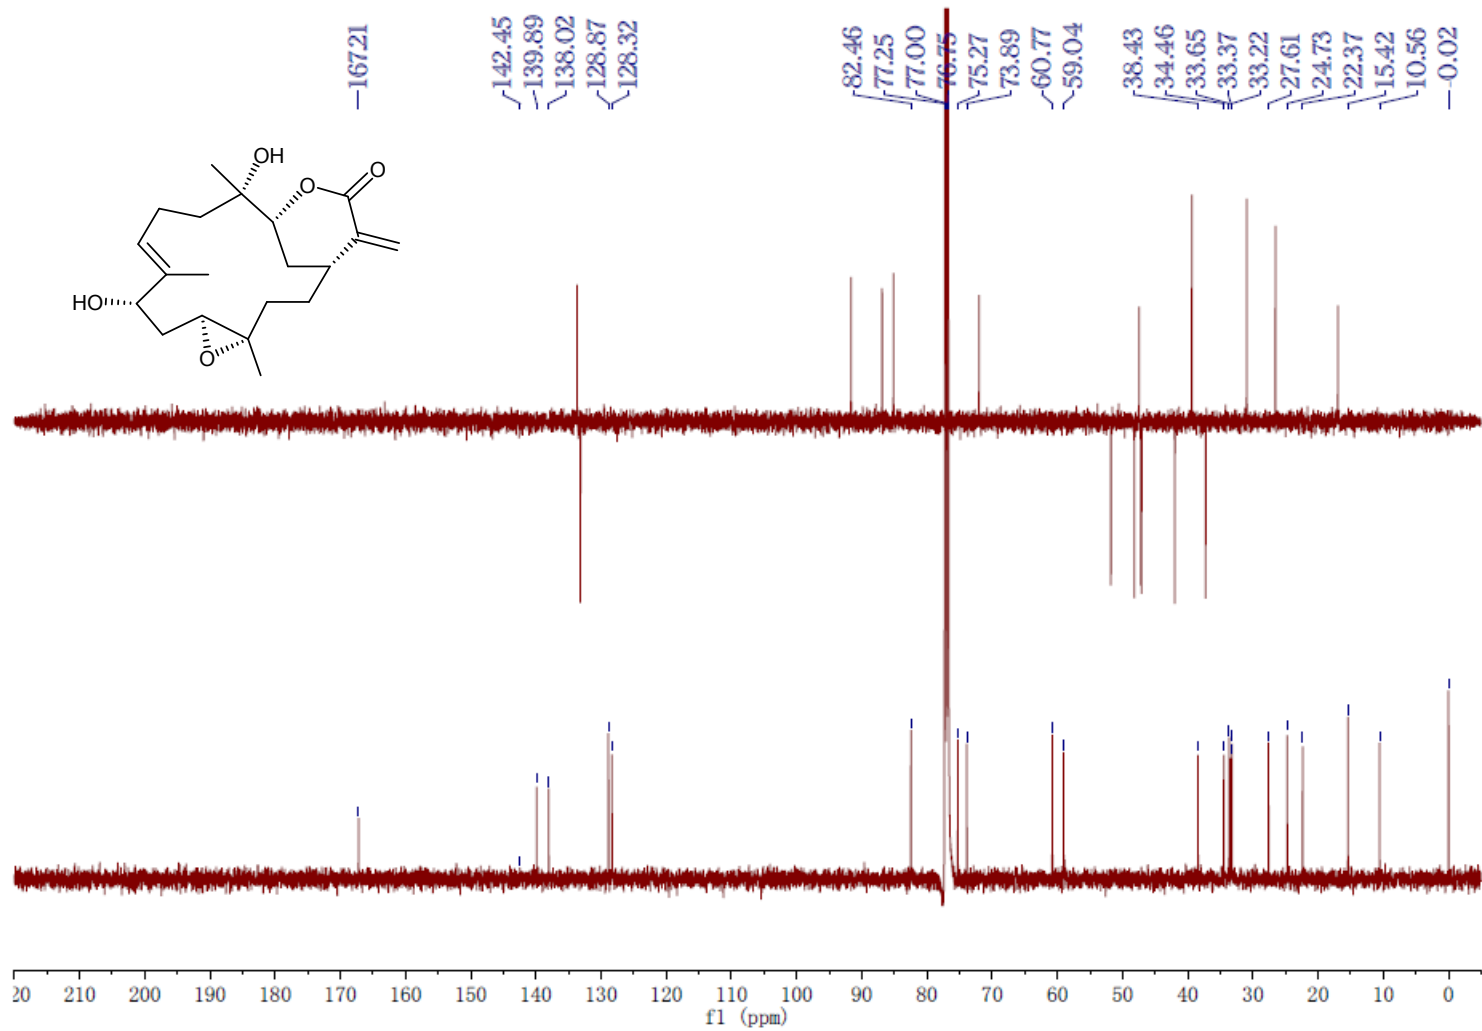

**Figure S3.** HMQC spectrum (400 MHz, CDCl<sub>3</sub>) of 9 $\alpha$ -hydroxy-flexibilide (**1**).

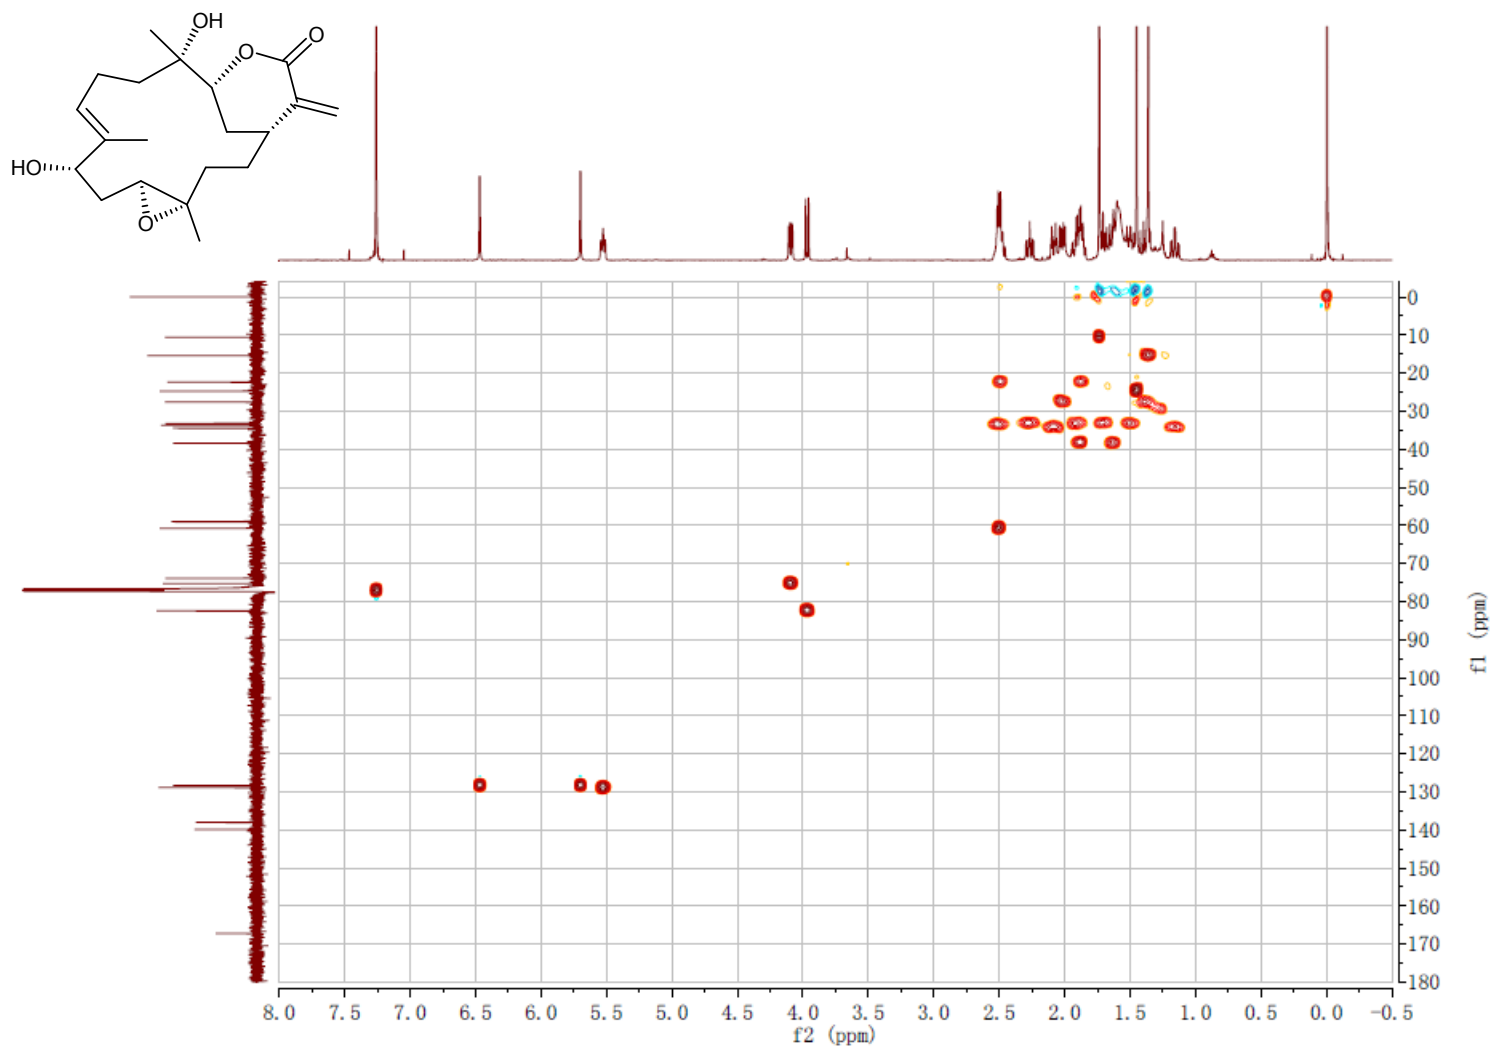

**Figure S4.** HMBC spectrum (400 MHz, CDCl<sub>3</sub>) of 9 $\alpha$ -hydroxy-flexibilide (**1**).

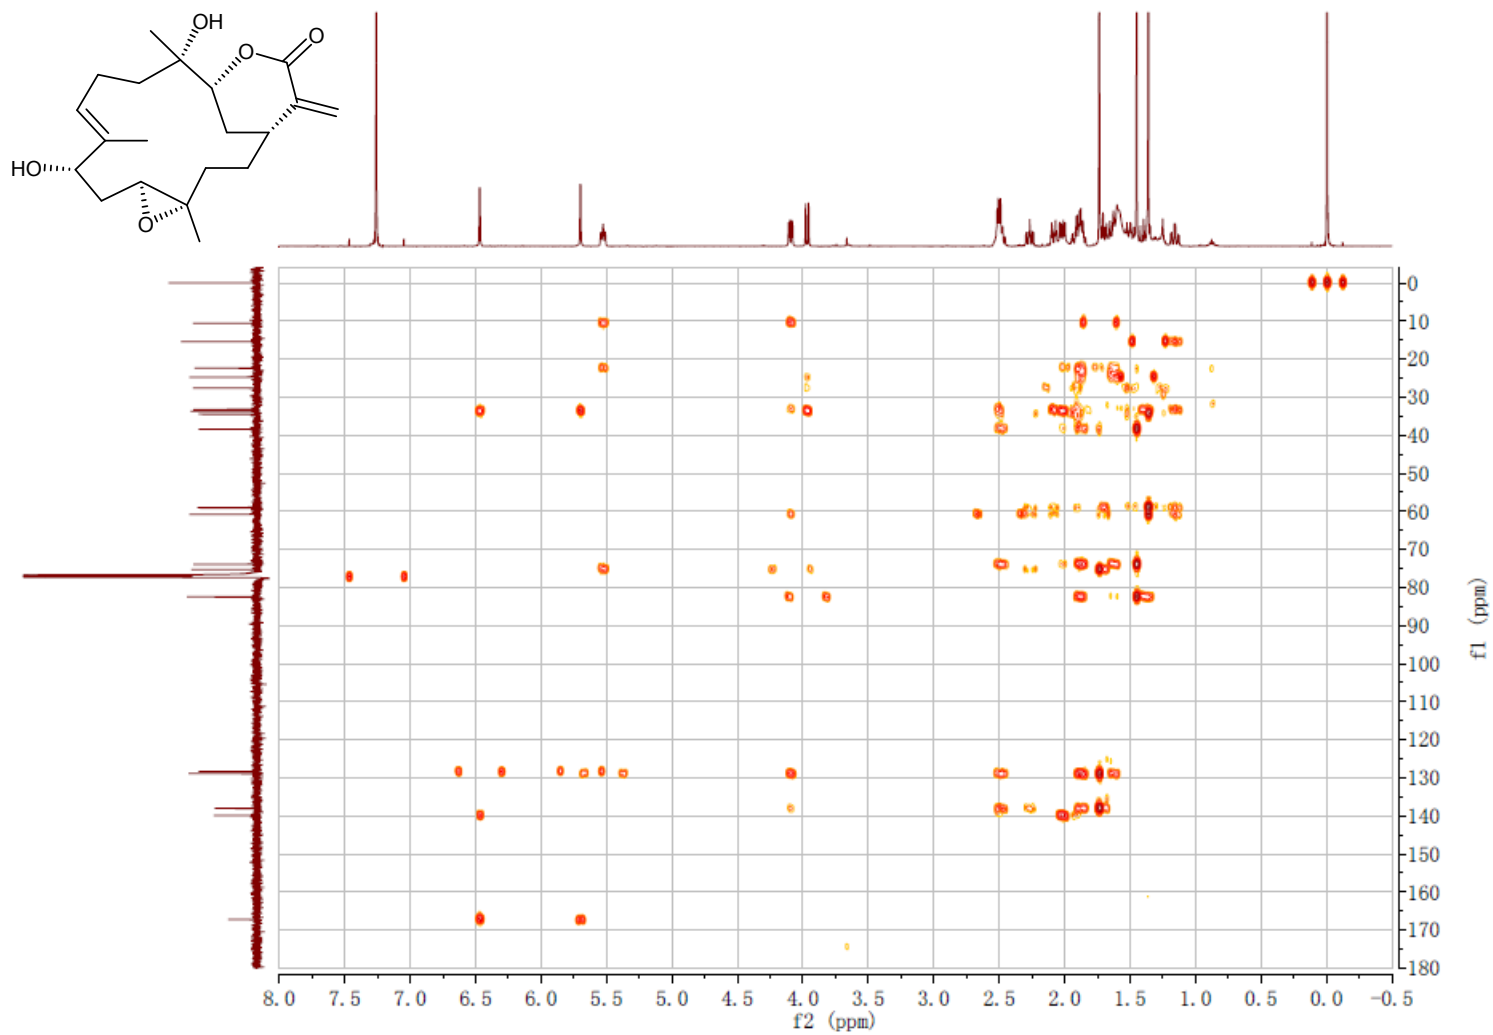



**Figure S5.**  $^1\text{H}$ - $^1\text{H}$  COSY spectrum (400 MHz,  $\text{CDCl}_3$ ) of  $9\alpha$ -hydroxy-flexibilide (**1**).

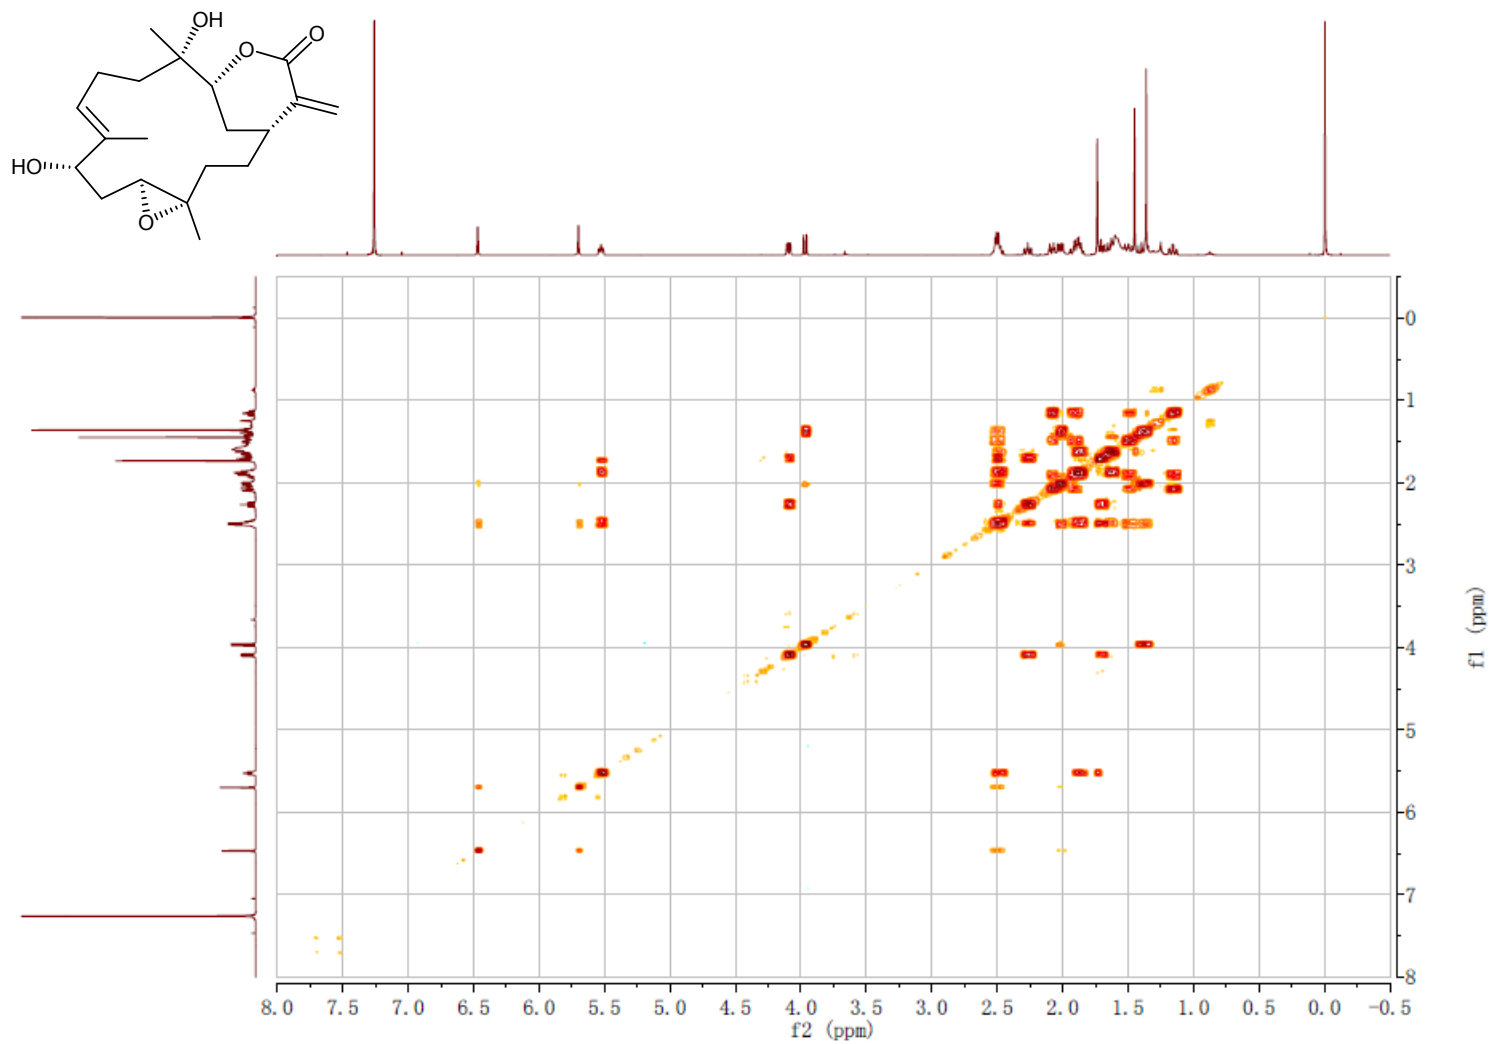

**Figure S6.** ROESY spectrum (400 MHz, CDCl<sub>3</sub>) of 9 $\alpha$ -hydroxy-flexibilide (**1**).

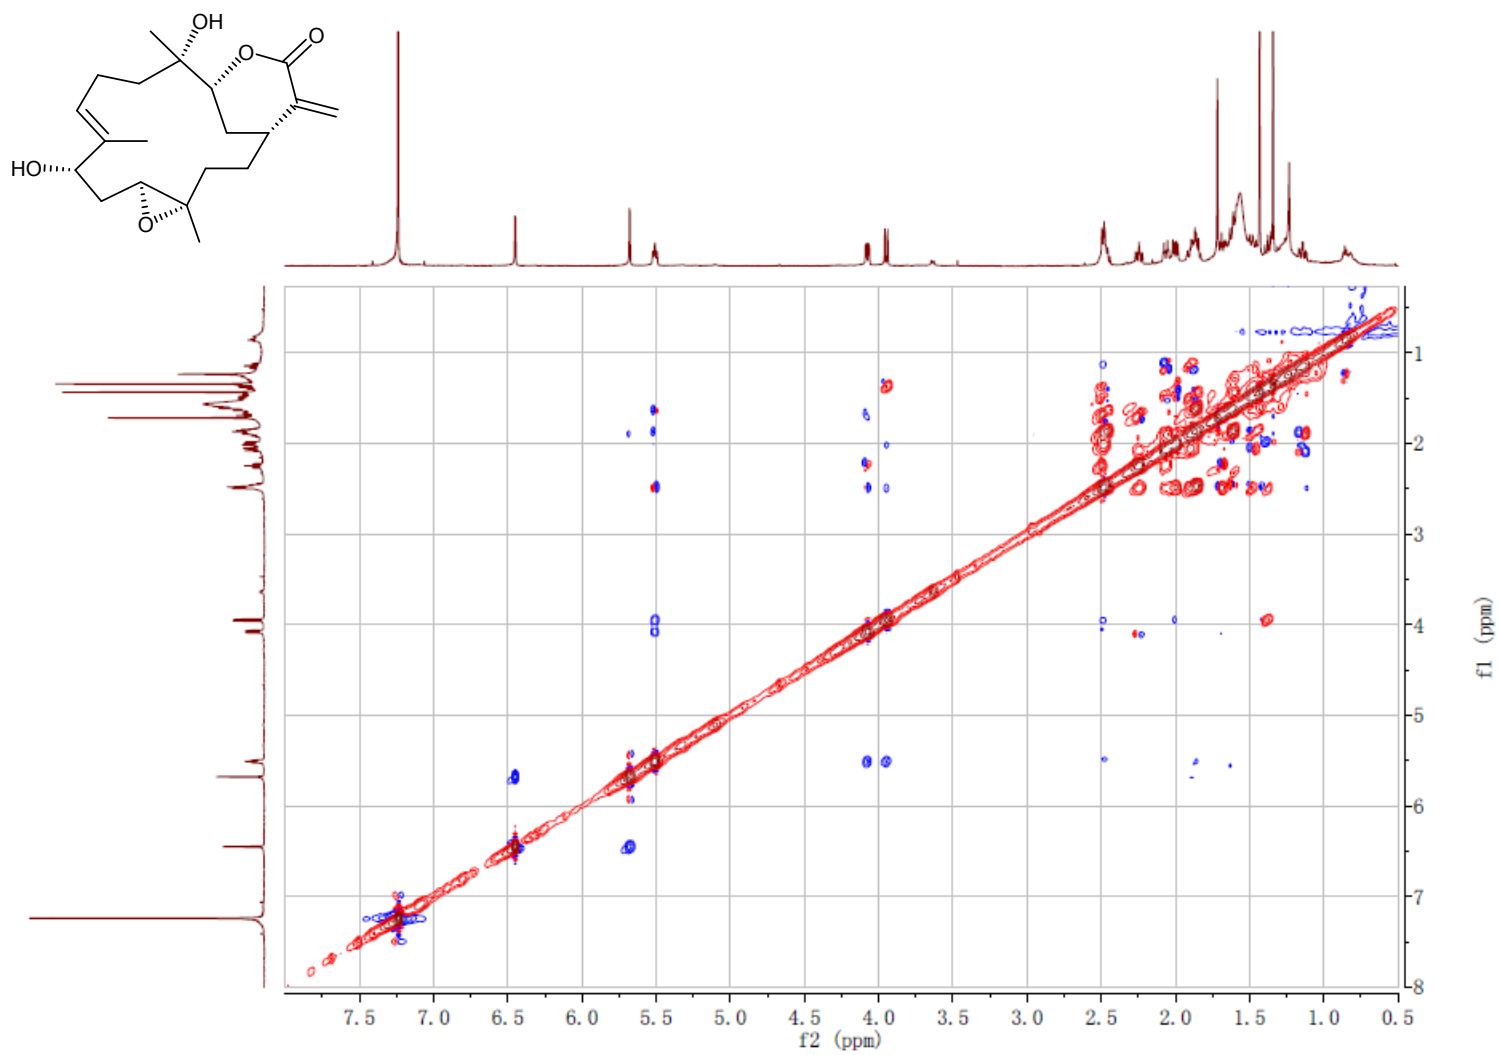

**Figure S7.** HRESIMS spectrum of 9 $\alpha$ -hydroxy-flexibilide (**1**).

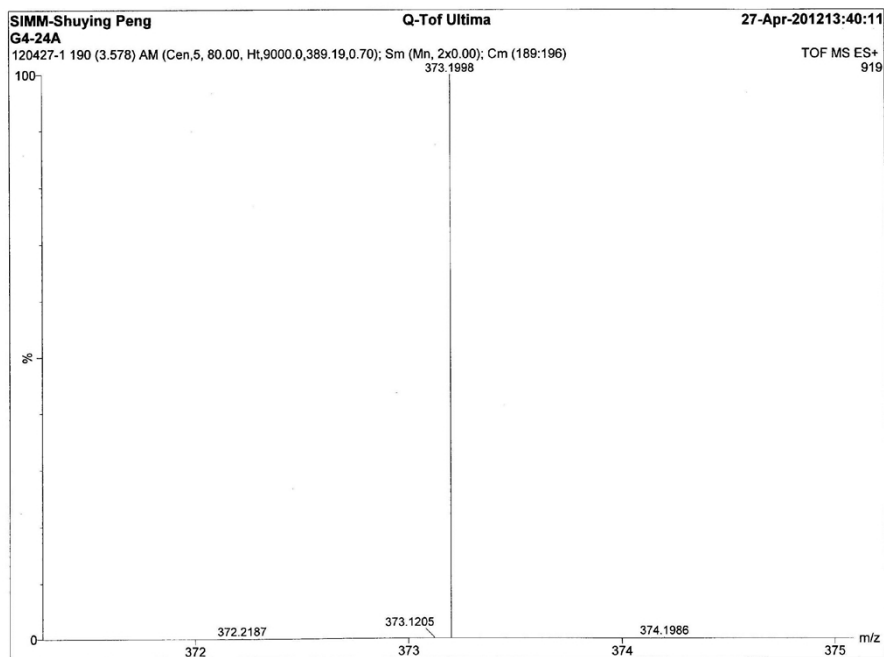

**Elemental Composition Report**

Page 1

Tolerance = 10.0 PPM / DBE: min = -1.5, max = 50.0  
 Isotope cluster parameters: Separation = 1.0 Abundance = 1.0%

Monoisotopic Mass, Odd and Even Electron Ions  
 18 formula(e) evaluated with 1 results within limits (up to 20 closest results for each mass)

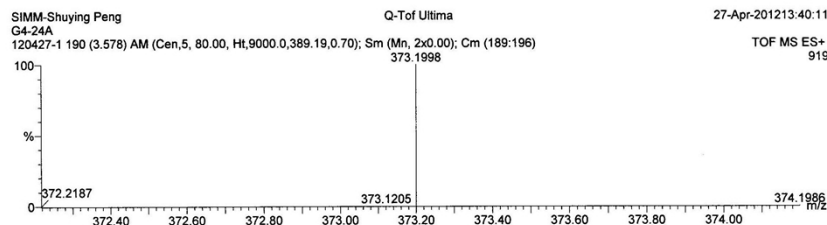

| Mass     | RA     | Calc. Mass | mDa | PPM | DBE | Score | Formula       |
|----------|--------|------------|-----|-----|-----|-------|---------------|
| 373.1998 | 100.00 | 373.1991   | 0.7 | 1.9 | 5.5 | 1     | C20 H30 O5 Na |

**Figure S8.**  $^1\text{H}$  NMR spectrum (400 MHz,  $\text{CDCl}_3$ ) of 15(17)-dehydromanaarenolide E (**2**)

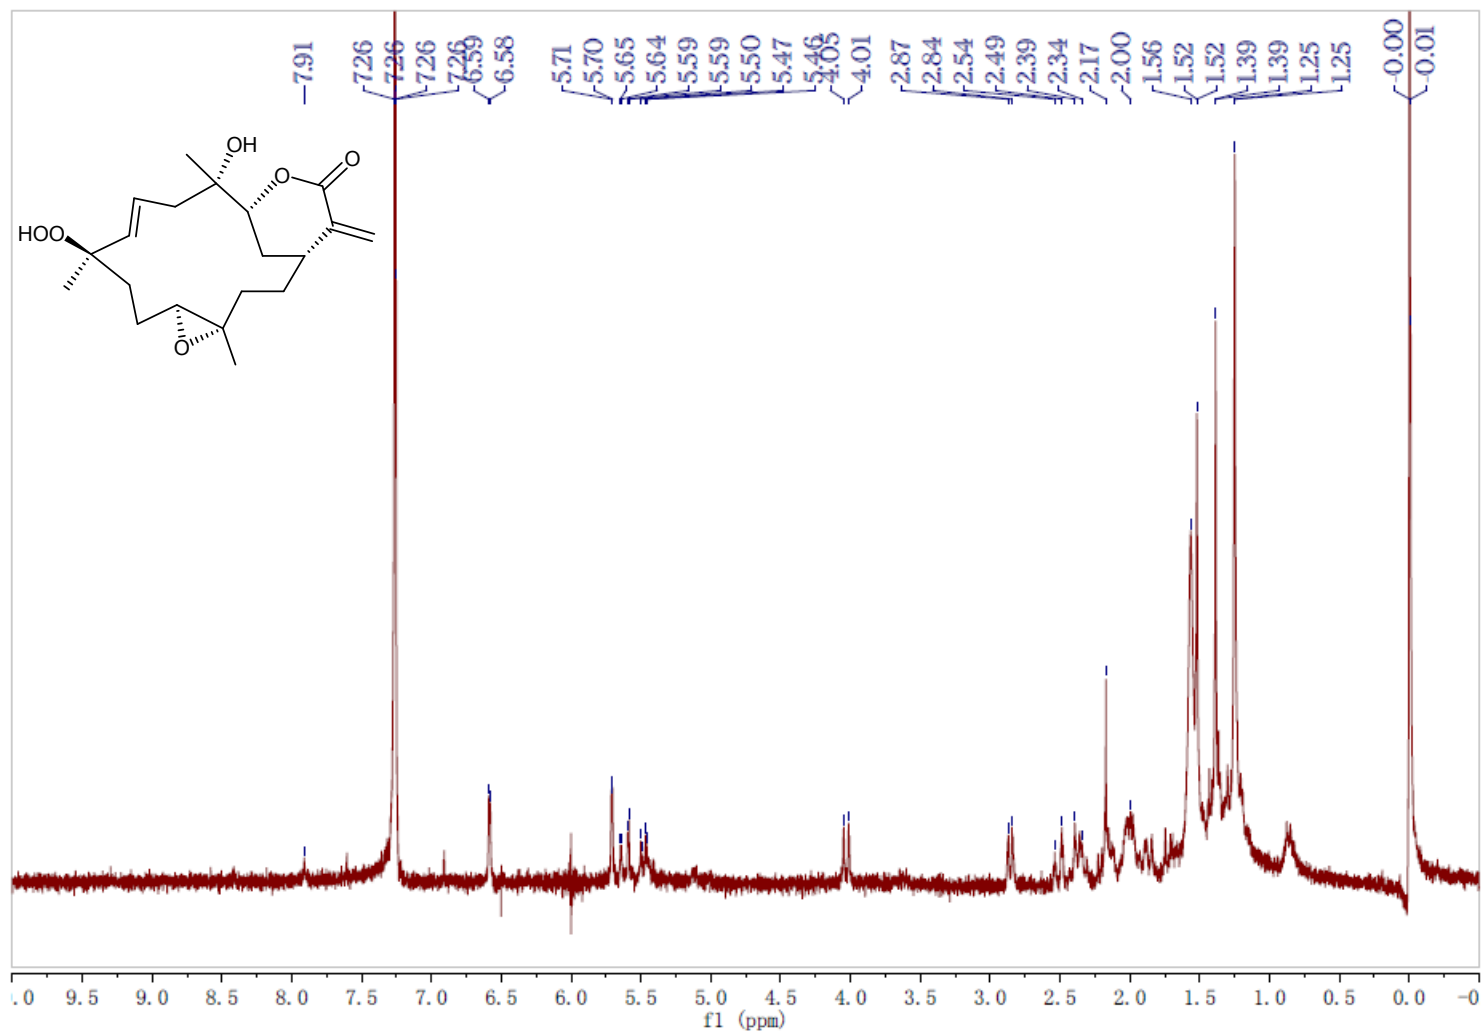

**Figure S9.**  $^{13}\text{C}$  NMR spectrum (100 MHz,  $\text{CDCl}_3$ ) of 15(17)-dehydromanaarenolide E (**2**)

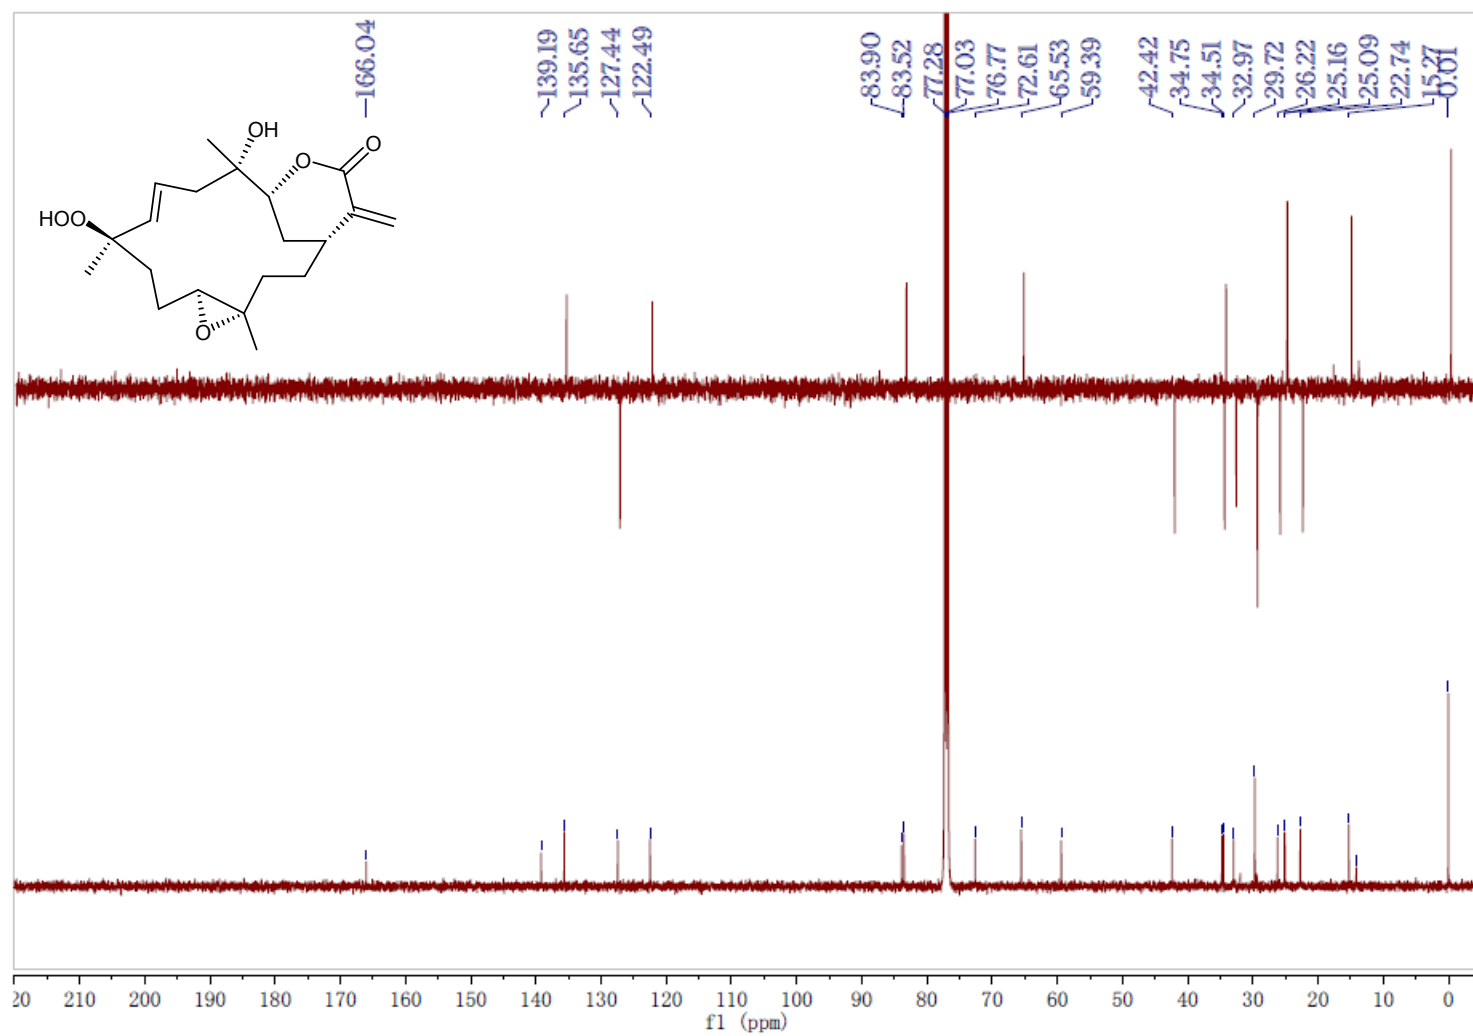

**Figure S10.** HRESIMS spectrum of 15(17)-dehydromanaarenolide E (2)

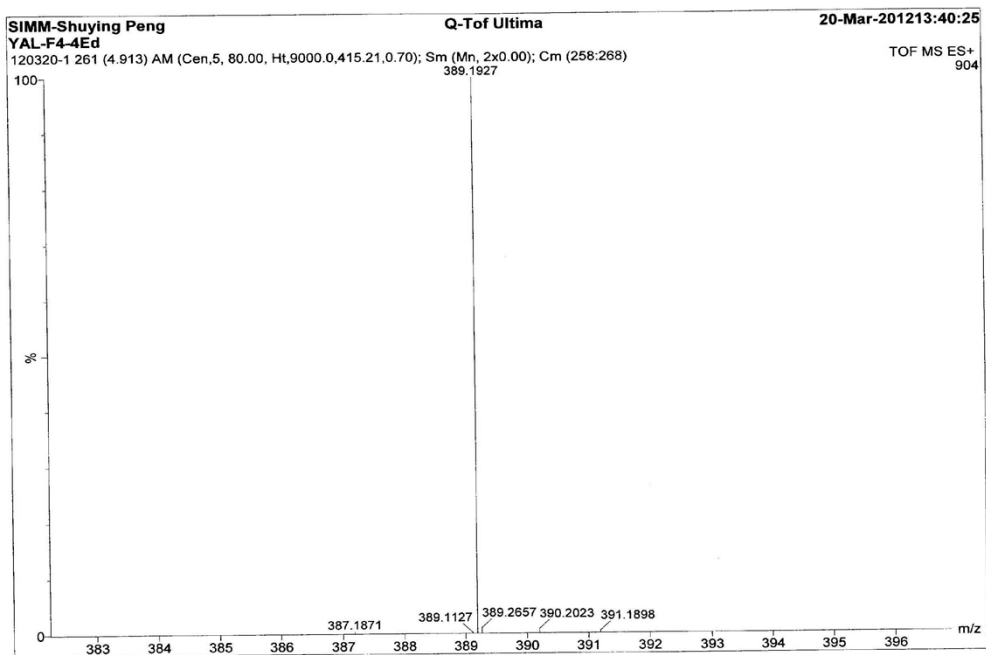

**Elemental Composition Report**

Page 1

Tolerance = 100.0 PPM / DBE: min = -1.5, max = 50.0  
 Isotope cluster parameters: Separation = 1.0 Abundance = 1.0%

Monoisotopic Mass, Odd and Even Electron Ions  
 15 formula(e) evaluated with 1 results within limits (up to 20 closest results for each mass)

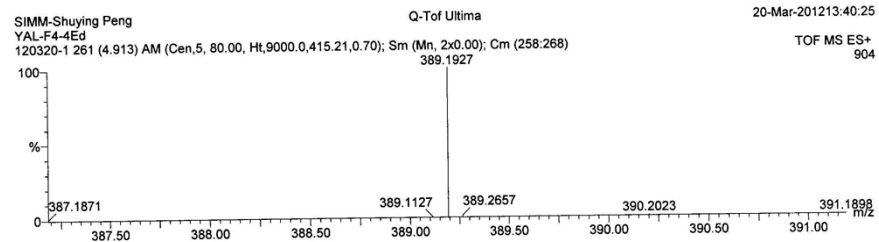

| Mass     | RA     | Calc. Mass | mDa  | PPM  | DBE | Score | Formula       |
|----------|--------|------------|------|------|-----|-------|---------------|
| 389.1927 | 100.00 | 389.1940   | -1.3 | -3.4 | 5.5 | 1     | C20 H30 O6 Na |

**Figure S11.**  $^1\text{H}$  NMR spectrum (400 MHz,  $\text{CDCl}_3$ ) of 8-dehydroxy-15(17)-dehydromanaarenolide E (**3**)

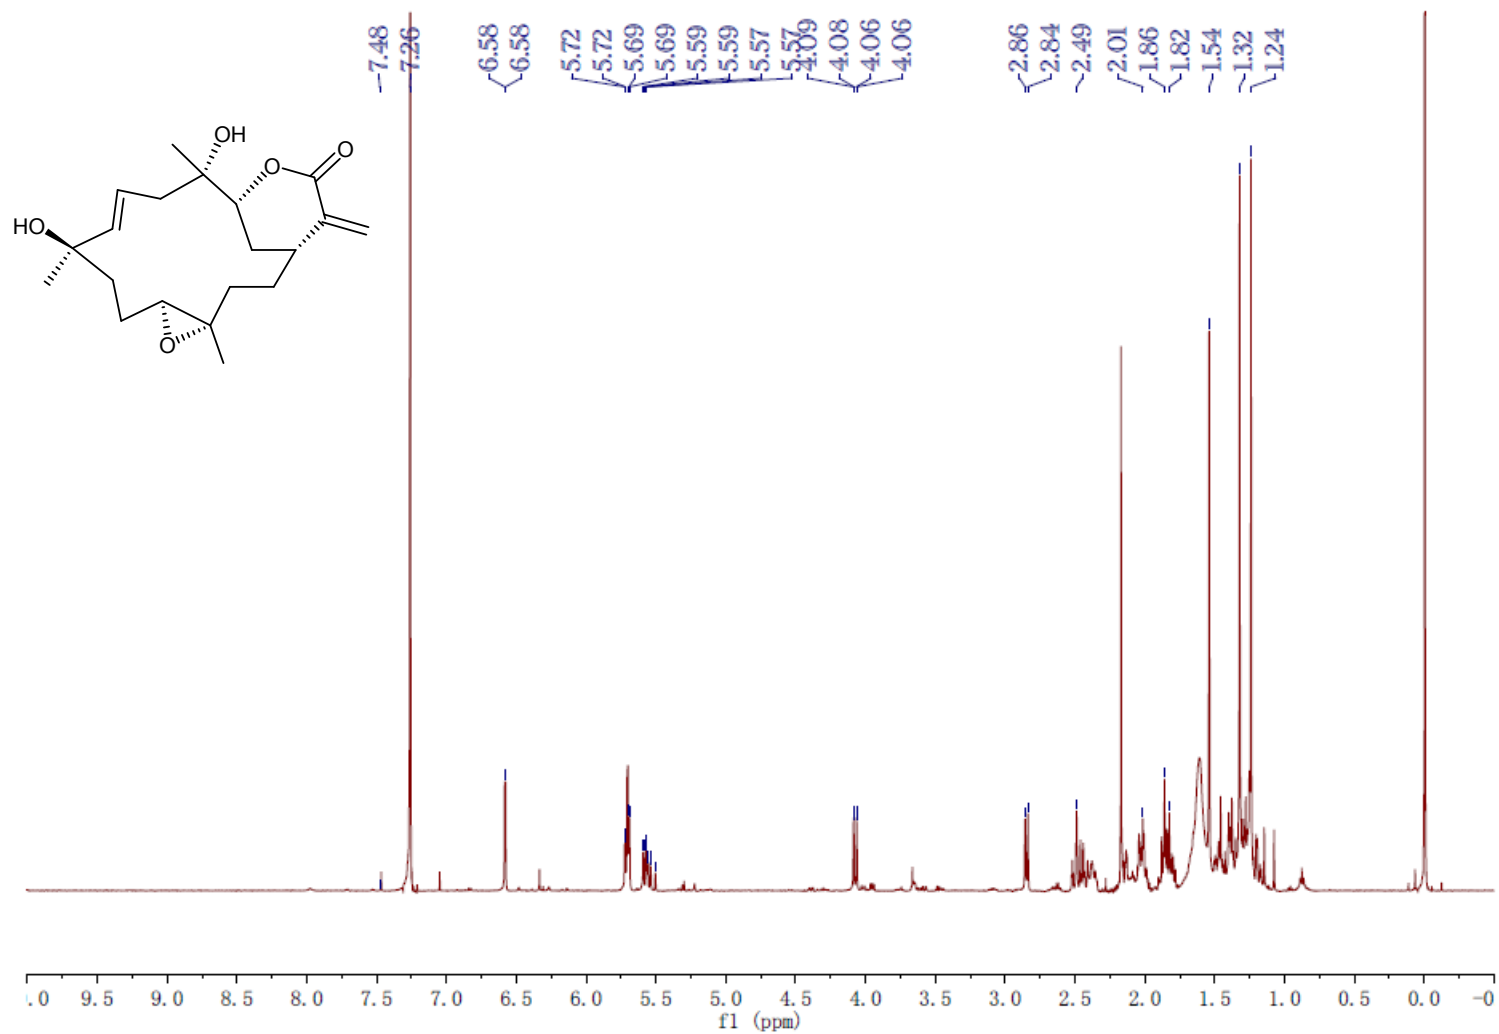

**Figure S12.**  $^{13}\text{C}$  NMR spectrum (100 MHz,  $\text{CDCl}_3$ ) of 8-dehydroxy-15(17)-dehydromanaarenolide E (**3**)

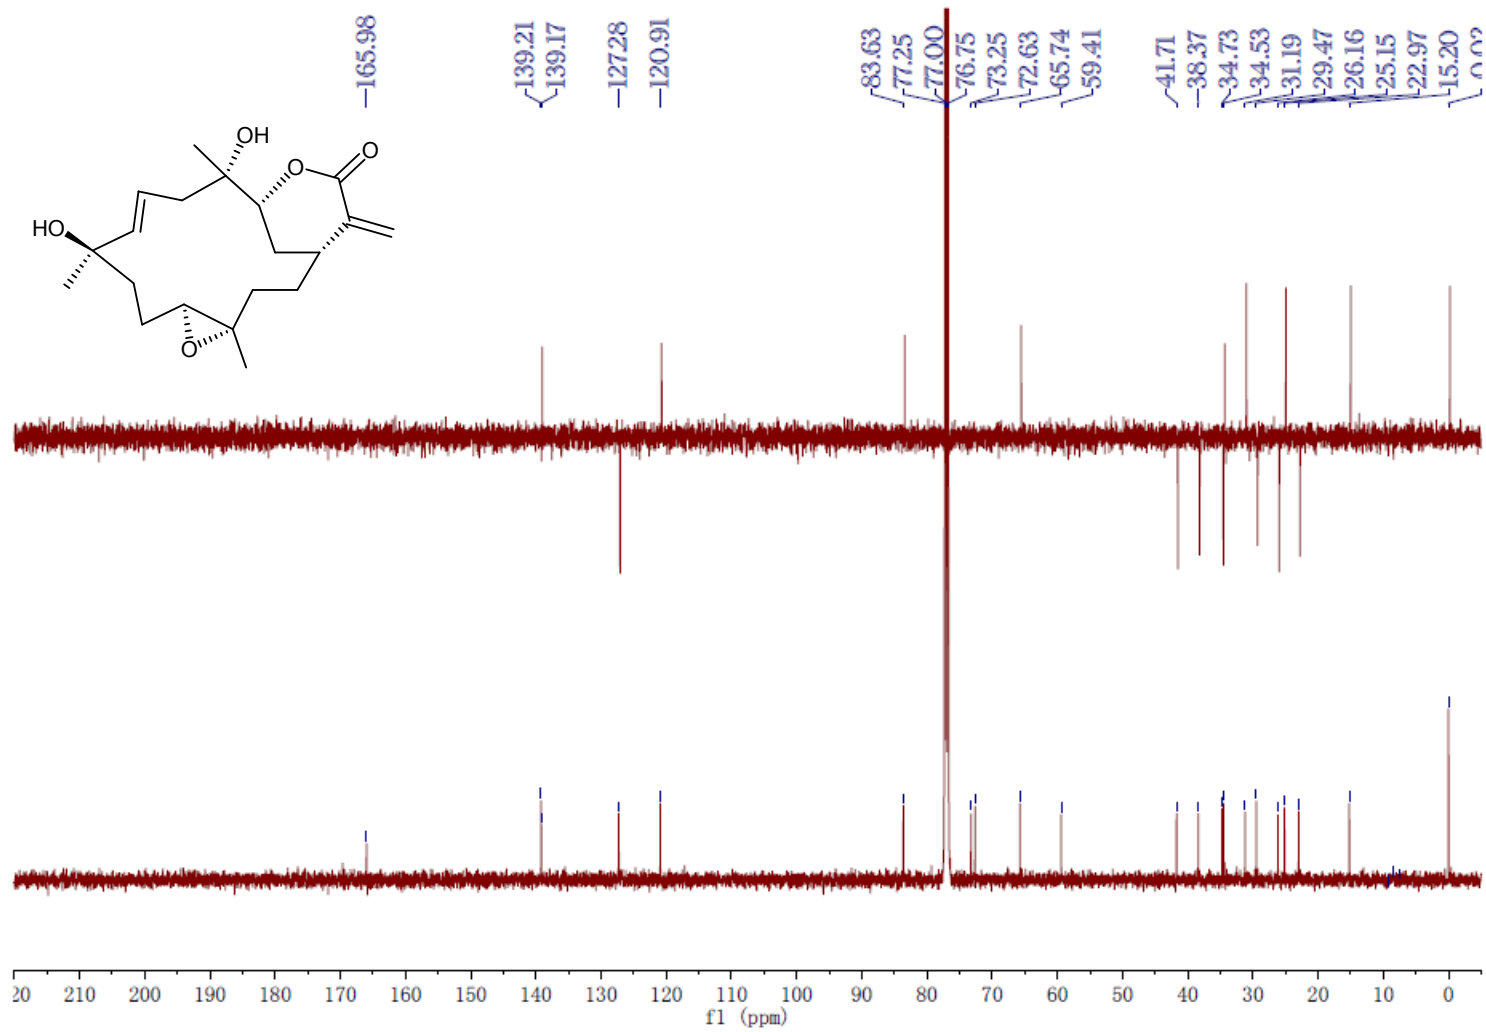



**Figure S13.** HMQC spectrum (400 MHz, CDCl<sub>3</sub>) of 8-dehydroxy-15(17)-dehydromanaarenolide E (**3**)

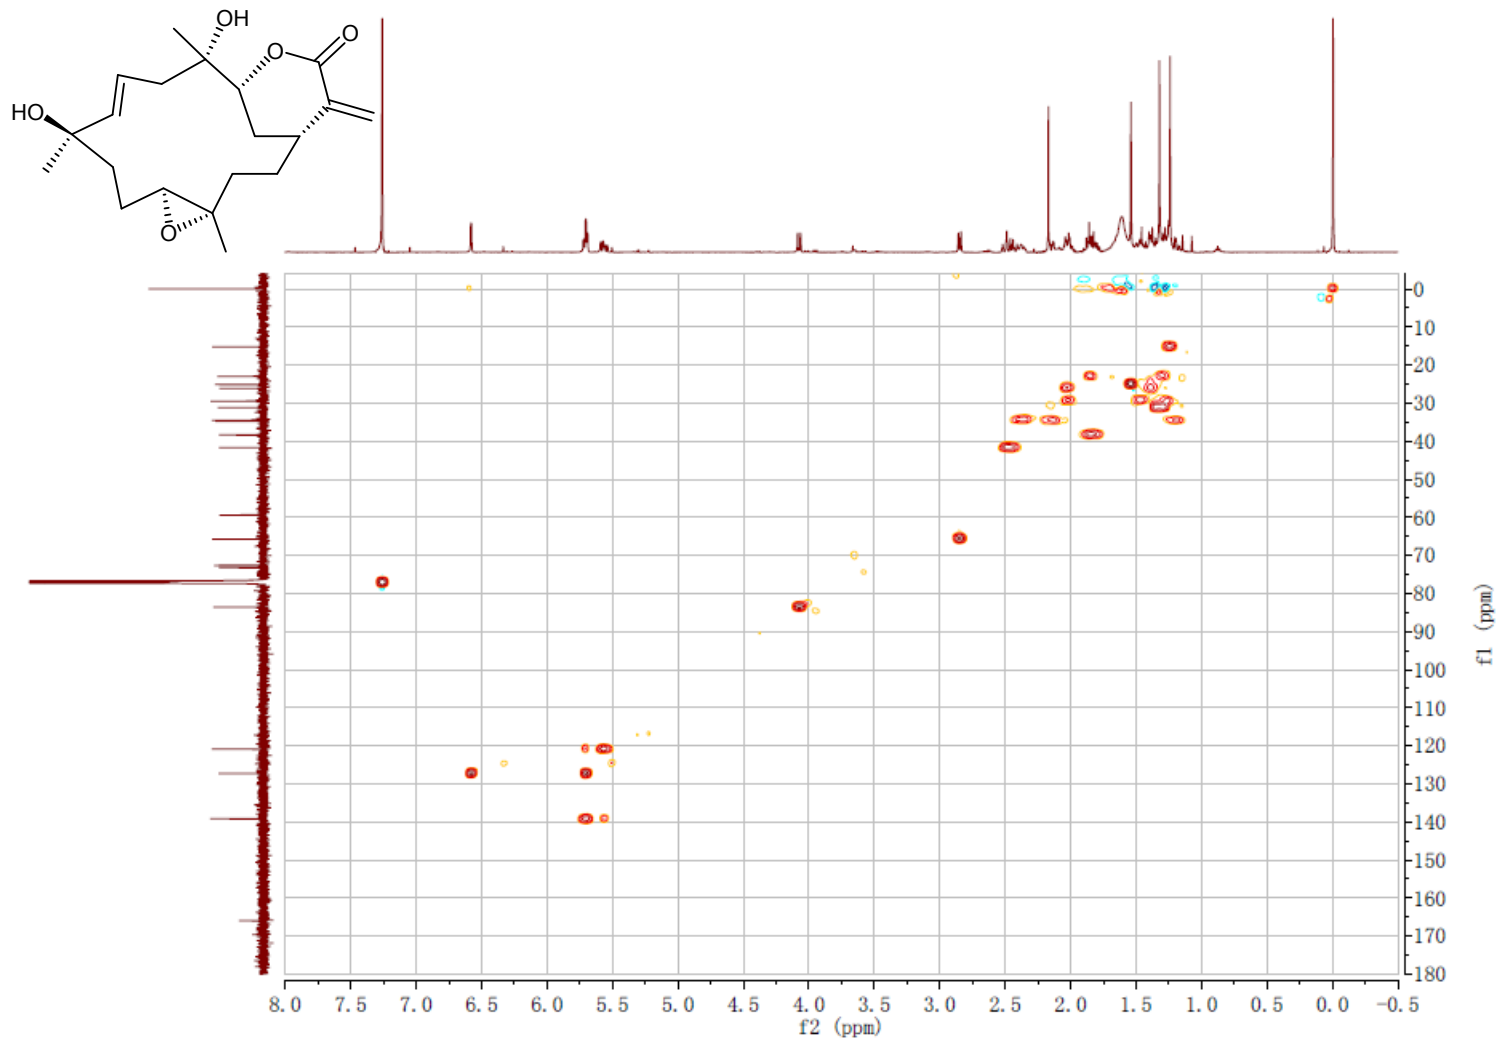

**Figure S14.** HMBC spectrum (400 MHz, CDCl<sub>3</sub>) of 8-dehydroxy-15(17)-dehydromanaarenolide E (**3**)

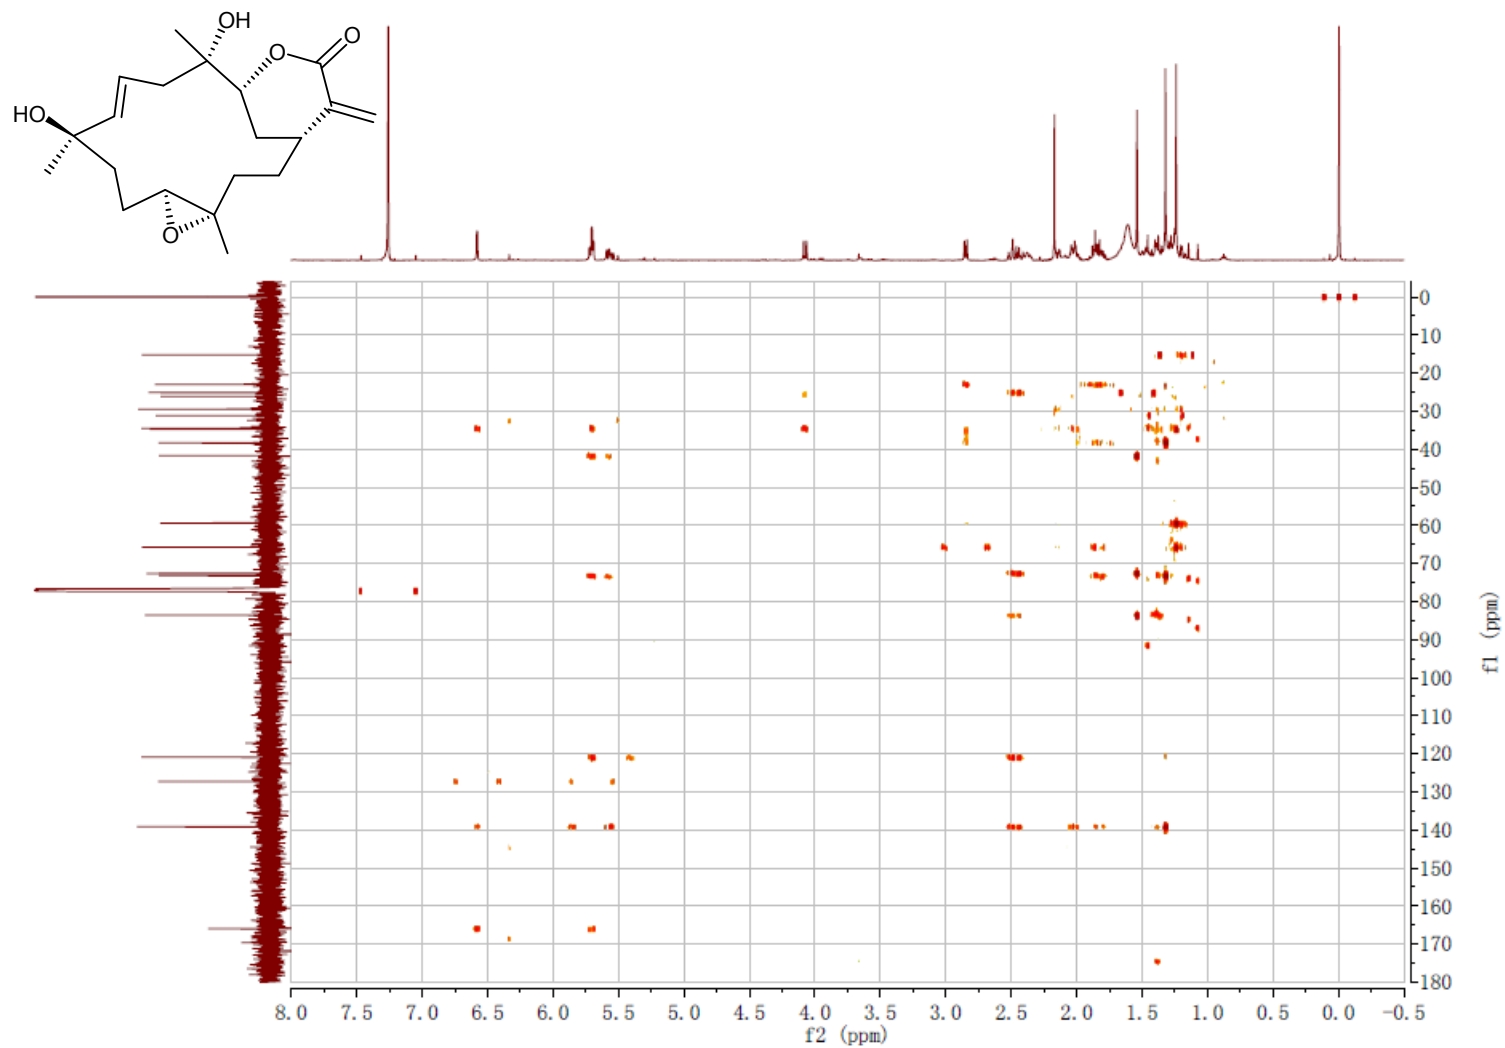

**Figure S15.**  $^1\text{H}$ - $^1\text{H}$  COSY spectrum (400 MHz,  $\text{CDCl}_3$ ) of 8-dehydroxy-15(17)-dehydromanaarenolide E (**3**)

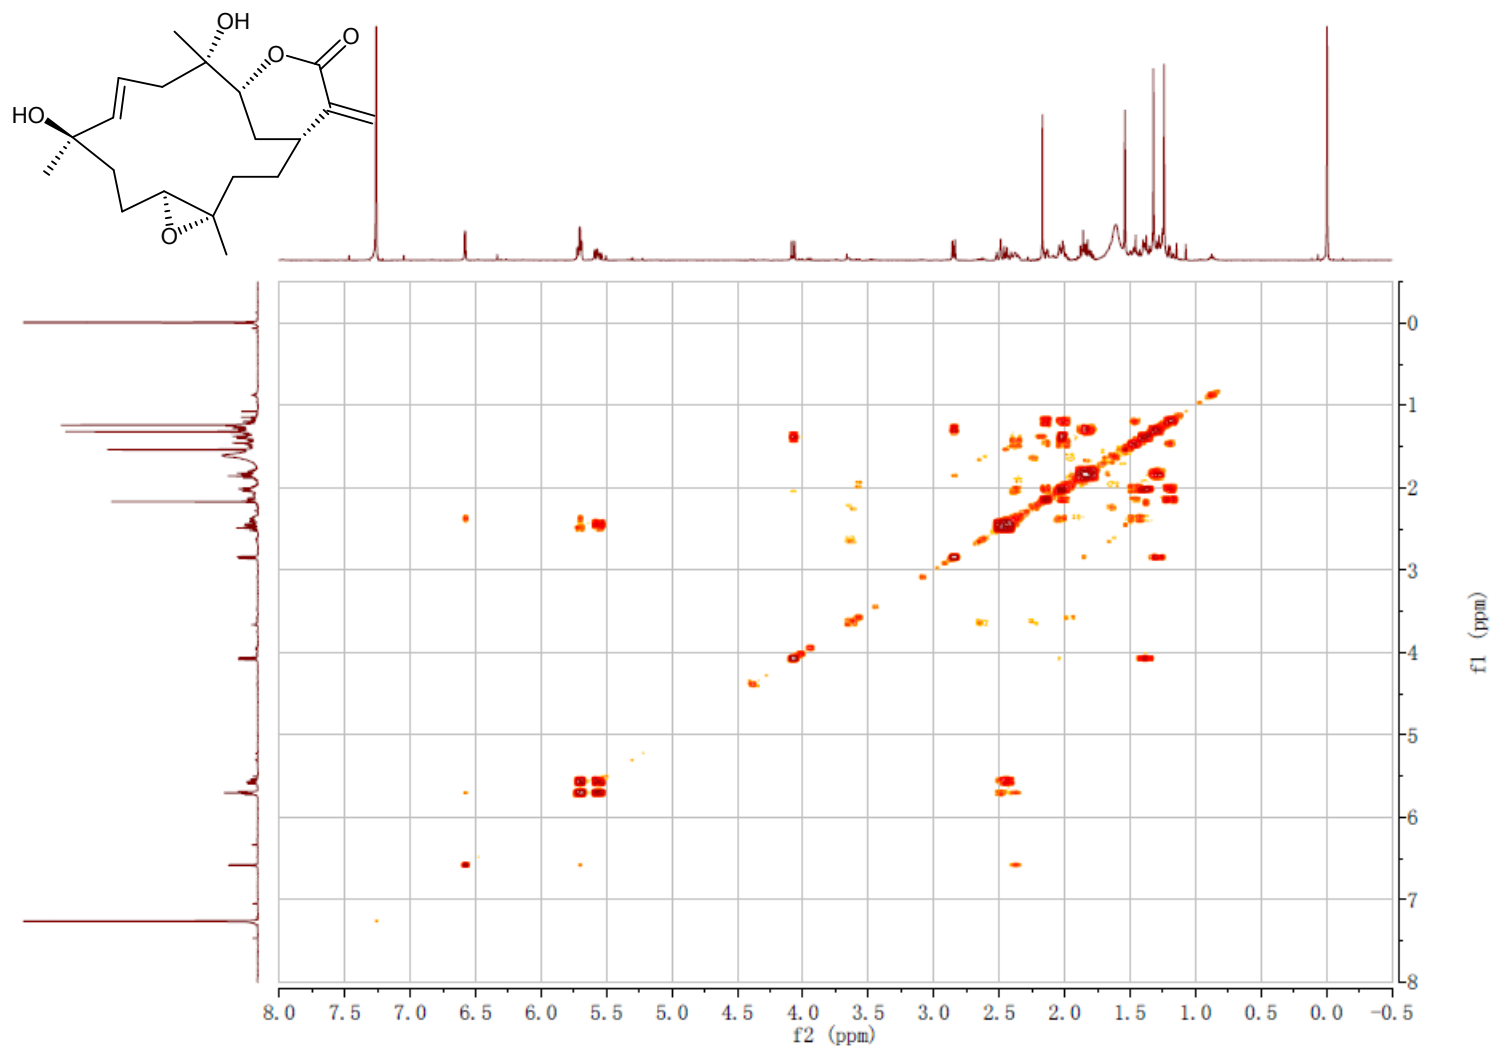

**Figure S16.** HRESIMS spectrum of 8-dehydroxy-15(17)-dehydromanaarenolide E (3)

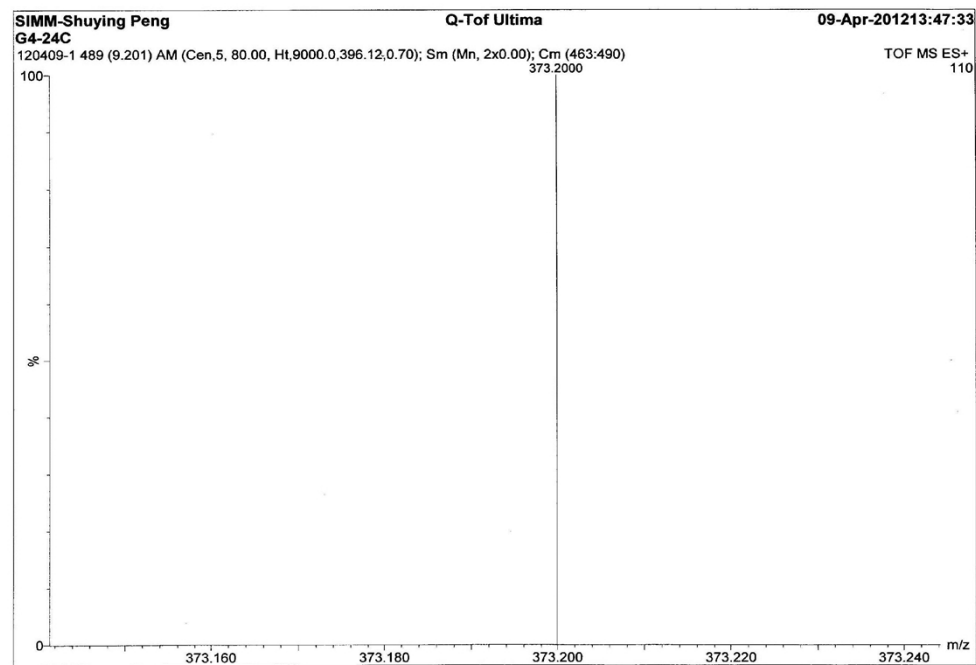

**Elemental Composition Report**

**Page 1**

Tolerance = 10.0 PPM / DBE: min = -1.5, max = 50.0  
 Isotope cluster parameters: Separation = 1.0 Abundance = 1.0%

Monoisotopic Mass, Odd and Even Electron Ions  
 13 formula(e) evaluated with 1 results within limits (up to 20 closest results for each mass)

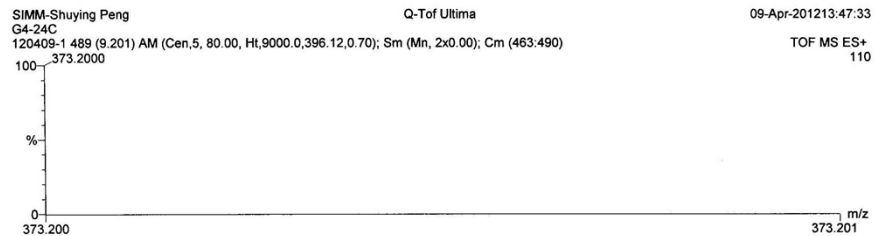

| Mass     | Calc. Mass | mDa | PPM | DBE | Score | Formula       |
|----------|------------|-----|-----|-----|-------|---------------|
| 373.2000 | 373.1991   | 0.9 | 2.4 | 5.5 | 1     | C20 H30 O5 Na |

**Figure S17.**  $^1\text{H}$  NMR spectrum (400 MHz,  $\text{CDCl}_3$ ) of 15,17-dedihydromanaarenolide A (**4**)

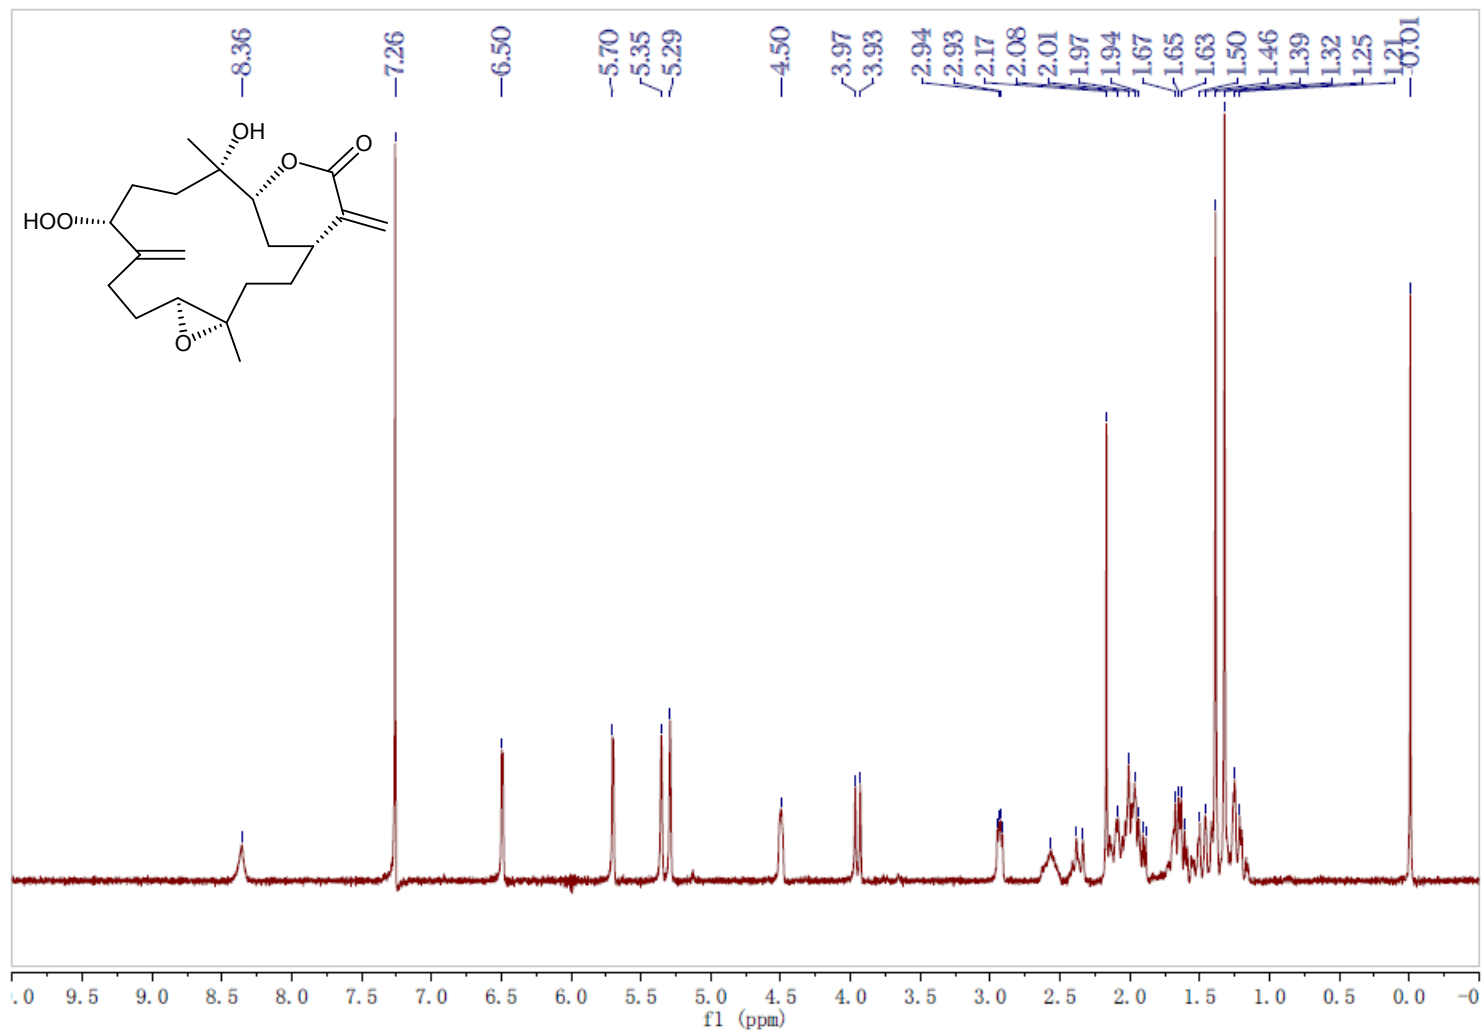

**Figure S18.**  $^{13}\text{C}$  NMR spectrum (100 MHz,  $\text{CDCl}_3$ ) of 15,17-dedihydromanaarenolide A (4)

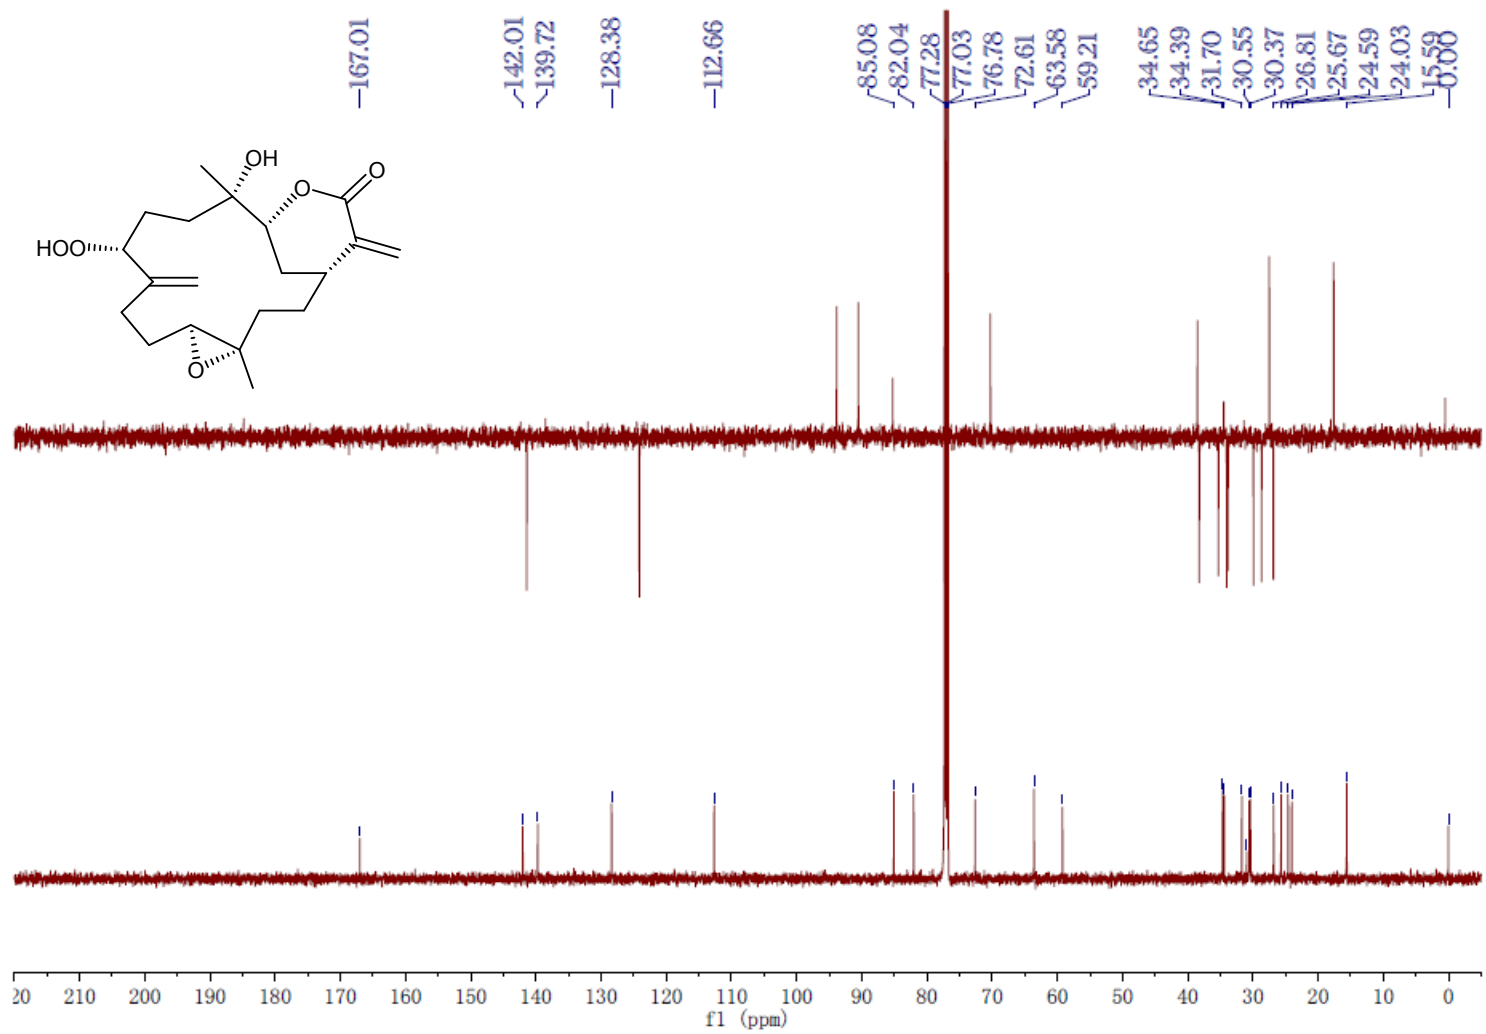

**Figure S19.** HRESIMS spectrum of 15,17-dedihydrimanaarenolide A (4)

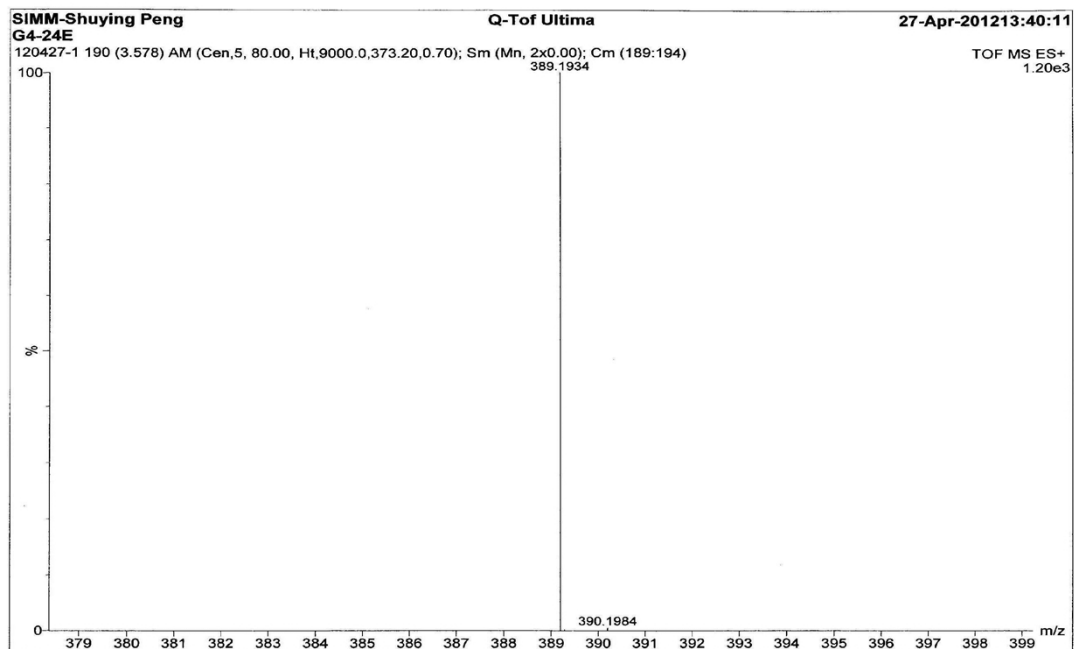

**Elemental Composition Report**

Page 1

Tolerance = 10.0 PPM / DBE: min = -1.5, max = 50.0  
 Isotope cluster parameters: Separation = 1.0 Abundance = 1.0%

Monoisotopic Mass, Odd and Even Electron Ions  
 15 formula(e) evaluated with 1 results within limits (up to 20 closest results for each mass)

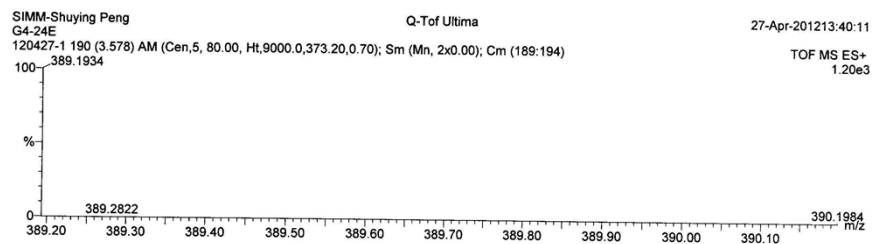

| Mass     | RA     | Calc. Mass | mDa  | PPM  | DBE | Score | Formula       |
|----------|--------|------------|------|------|-----|-------|---------------|
| 389.1934 | 100.00 | 389.1940   | -0.6 | -1.6 | 5.5 | 1     | C20 H30 O6 Na |

**Figure S20.** <sup>1</sup>H NMR spectrum (400 MHz, CDCl<sub>3</sub>) of 15,17-dedihydrimanaarenolide C (5)

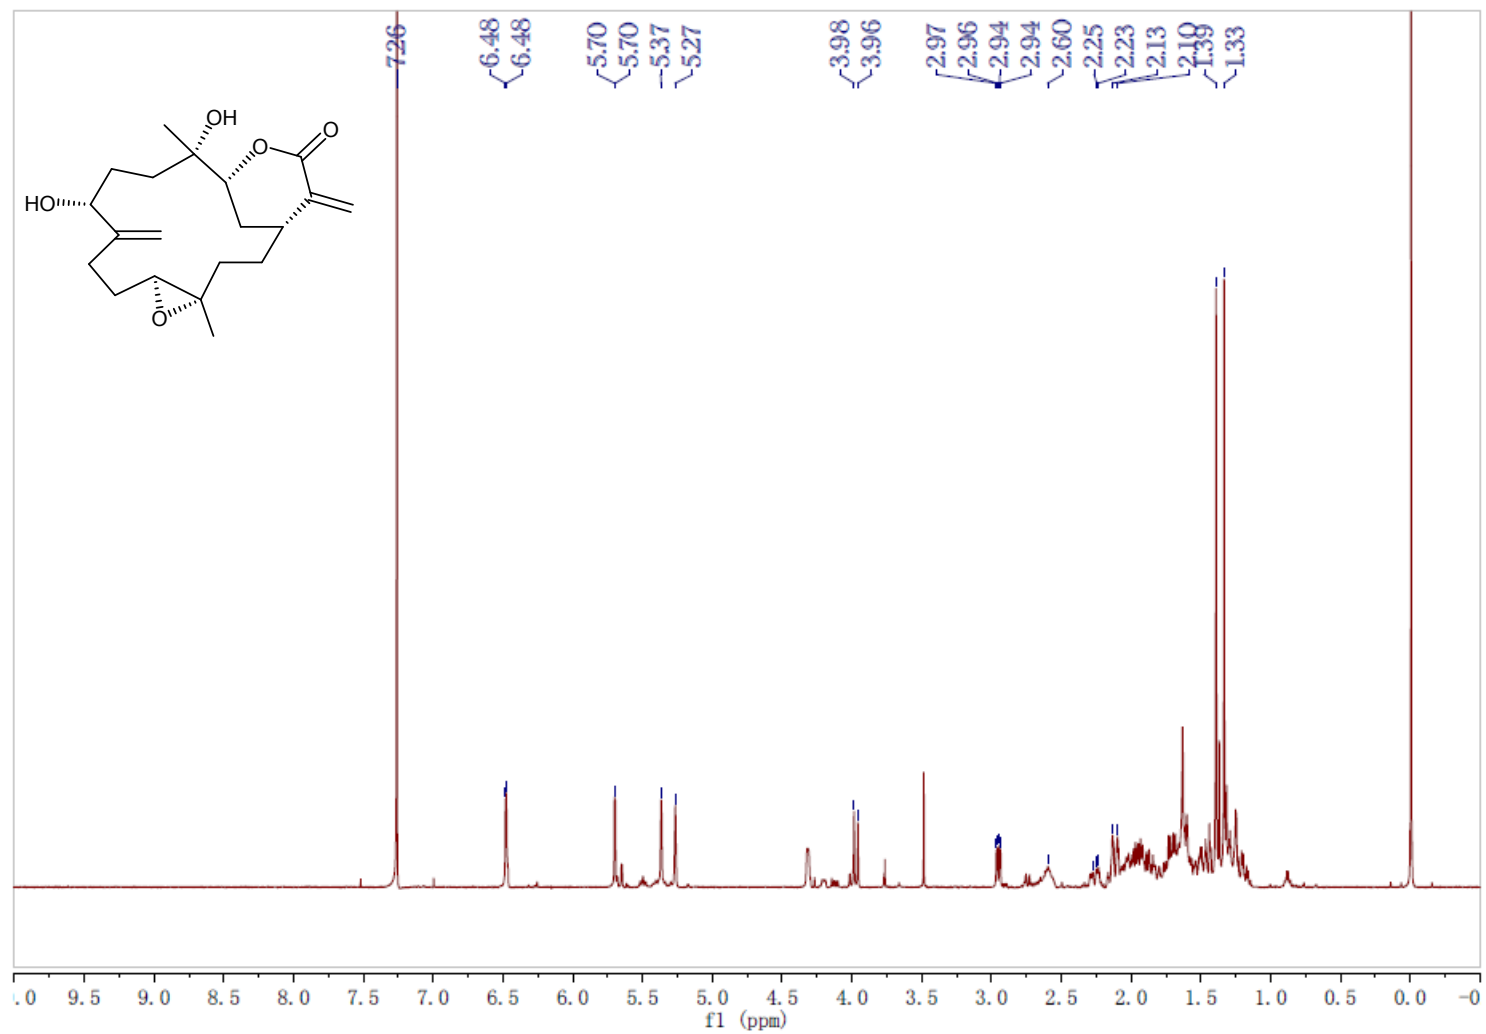

**Figure S21.**  $^{13}\text{C}$  NMR spectrum (100 MHz,  $\text{CDCl}_3$ ) of 15,17-dedihydromanaarenolide C (5)



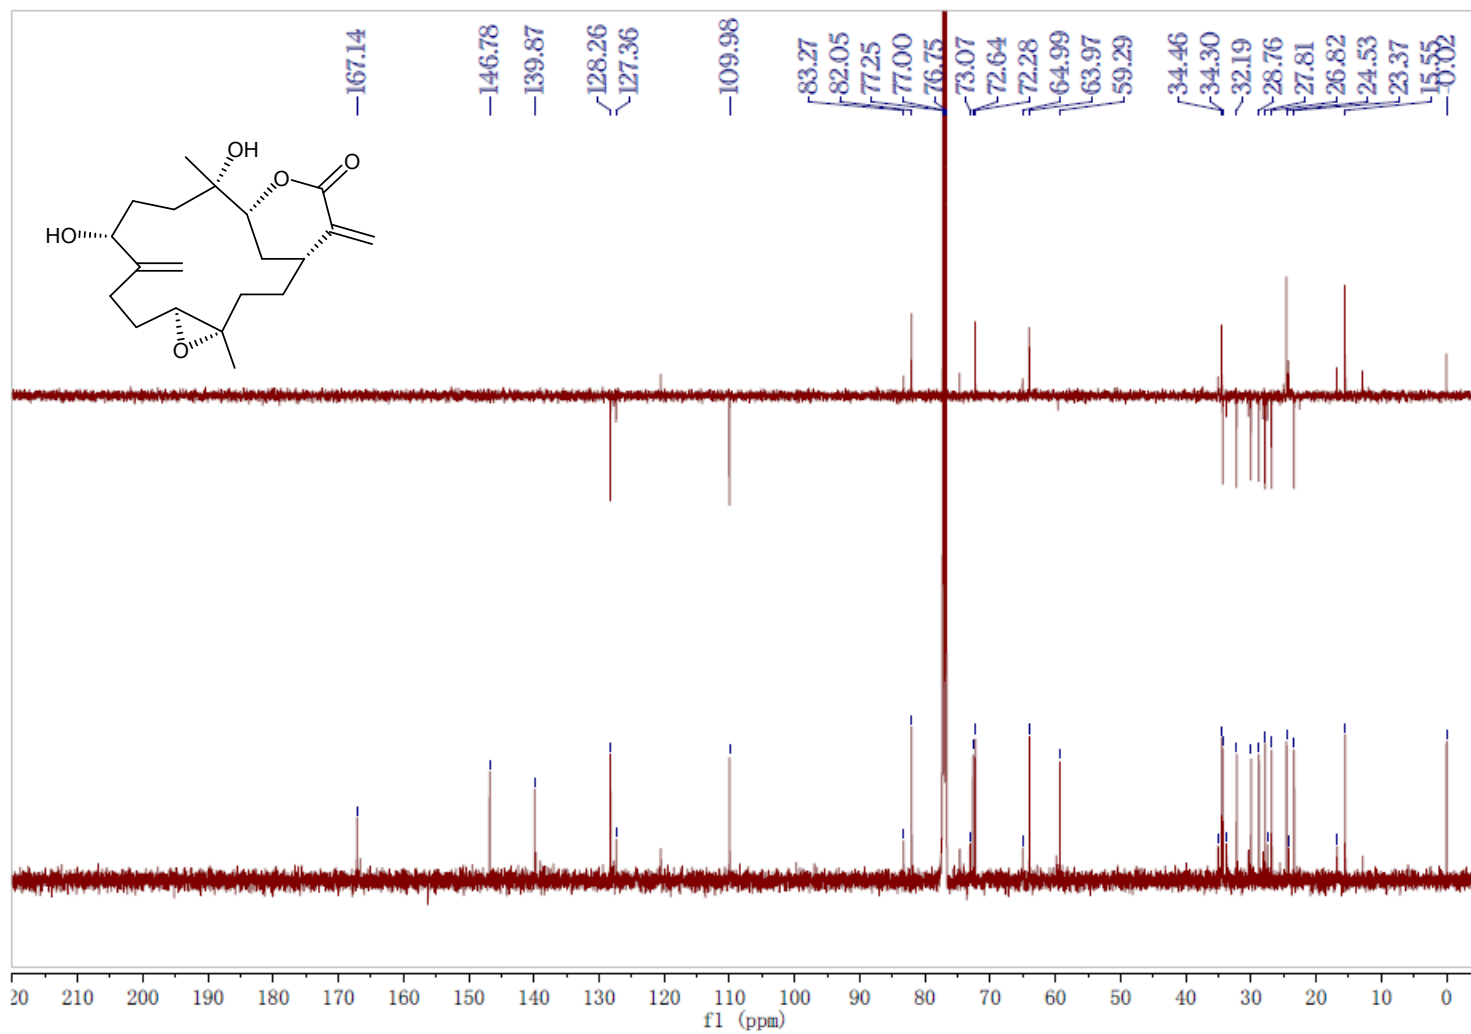

**Figure S22.** HRESIMS spectrum of 15,17-dedihydrimanaarenolide C (5)

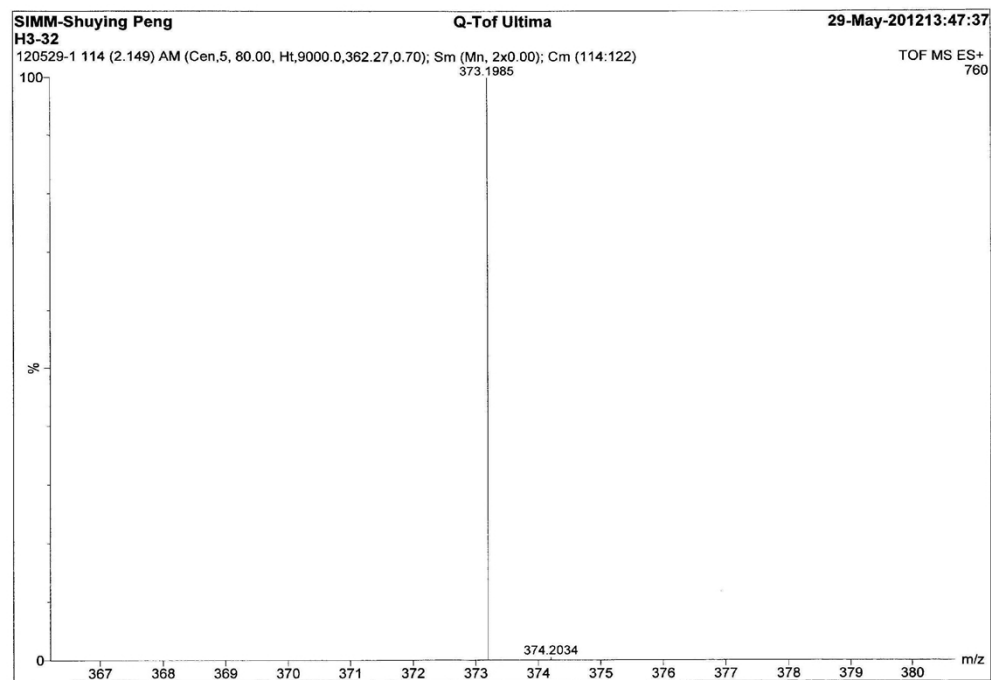

Elemental Composition Report

Page 1

Tolerance = 30.0 PPM / DBE: min = -1.5, max = 50.0  
Isotope cluster parameters: Separation = 1.0 Abundance = 1.0%

Monoisotopic Mass, Odd and Even Electron Ions  
13 formula(e) evaluated with 1 results within limits (up to 20 closest results for each mass)

SIMM-Shuying Peng Q-ToF Ultima 29-May-201213:47:37  
H3-32  
120529-1 114 (2.149) AM (Cen,5, 80.00, Ht,9000.0,362.27,0.70); Sm (Mn, 2x0.00); Cm (114:122) TOF MS ES+ 760

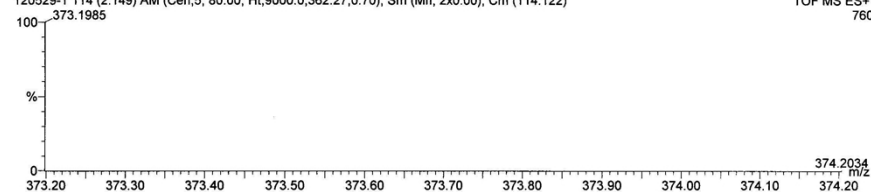

| Mass     | RA     | Calc. Mass | mDa  | PPM  | DBE | Score | Formula       |
|----------|--------|------------|------|------|-----|-------|---------------|
| 373.1985 | 100.00 | 373.1991   | -0.6 | -1.6 | 5.5 | 1     | C20 H30 O5 Na |

Figure S23  $^1\text{H}$  NMR spectrum (400 MHz,  $\text{CDCl}_3$ ) of *epi*-flexilarin A (6)

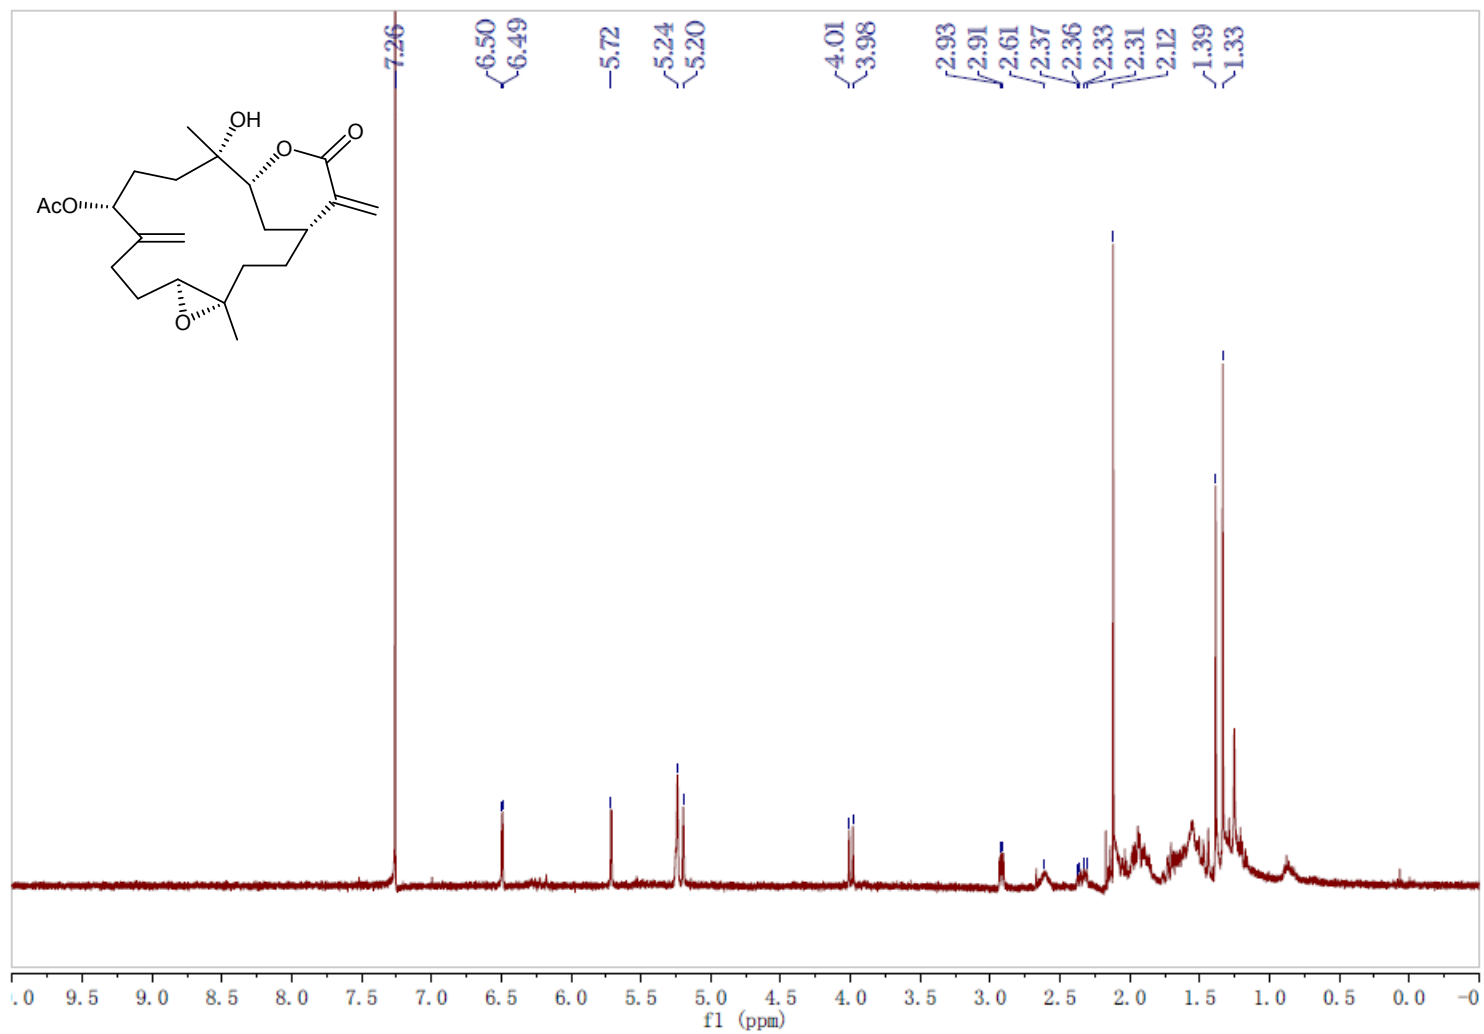

**Figure S24** HRESIMS spectrum of *epi*-flexilarin A (6)

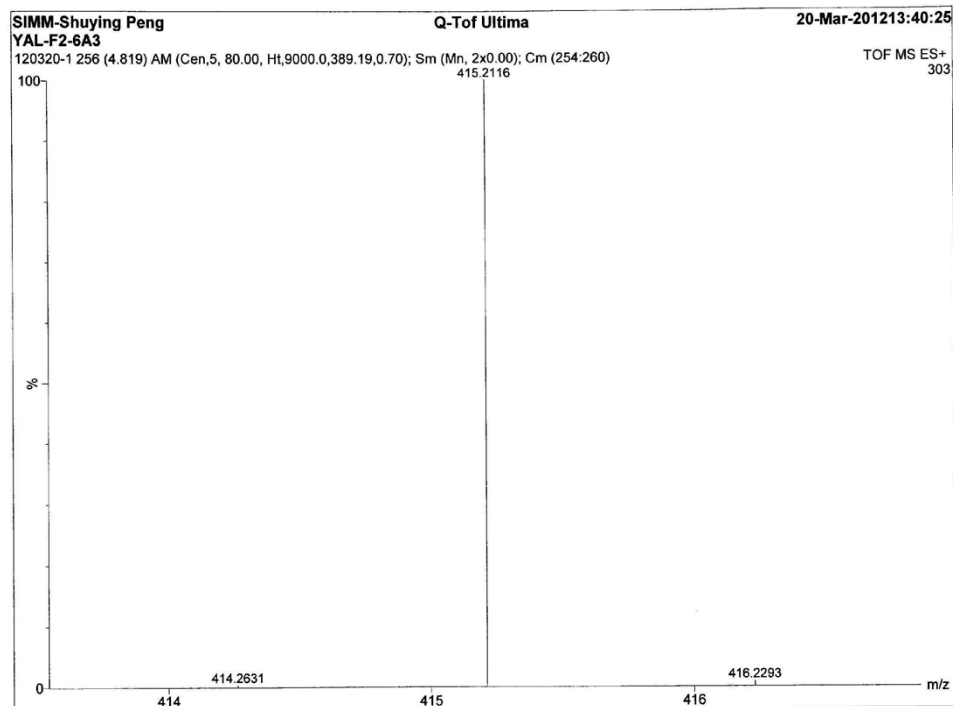

Elemental Composition Report

Page 1

Tolerance = 100.0 PPM / DBE: min = -1.5, max = 50.0  
 Isotope cluster parameters: Separation = 1.0 Abundance = 1.0%

Monoisotopic Mass, Odd and Even Electron Ions  
 14 formula(e) evaluated with 1 results within limits (up to 20 closest results for each mass)

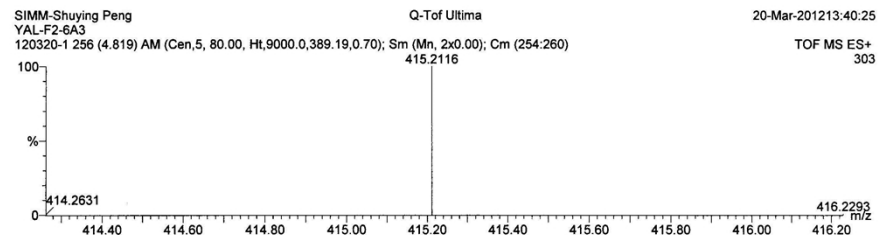

| Mass     | RA     | Calc. Mass | mDa | PPM | DBE | Score | Formula       |
|----------|--------|------------|-----|-----|-----|-------|---------------|
| 415.2116 | 100.00 | 415.2097   | 1.9 | 4.7 | 6.5 | 1     | C22 H32 O6 Na |

Figure S25. <sup>1</sup>H NMR spectrum (400 MHz, CDCl<sub>3</sub>) of epoxyflexibilene (7)

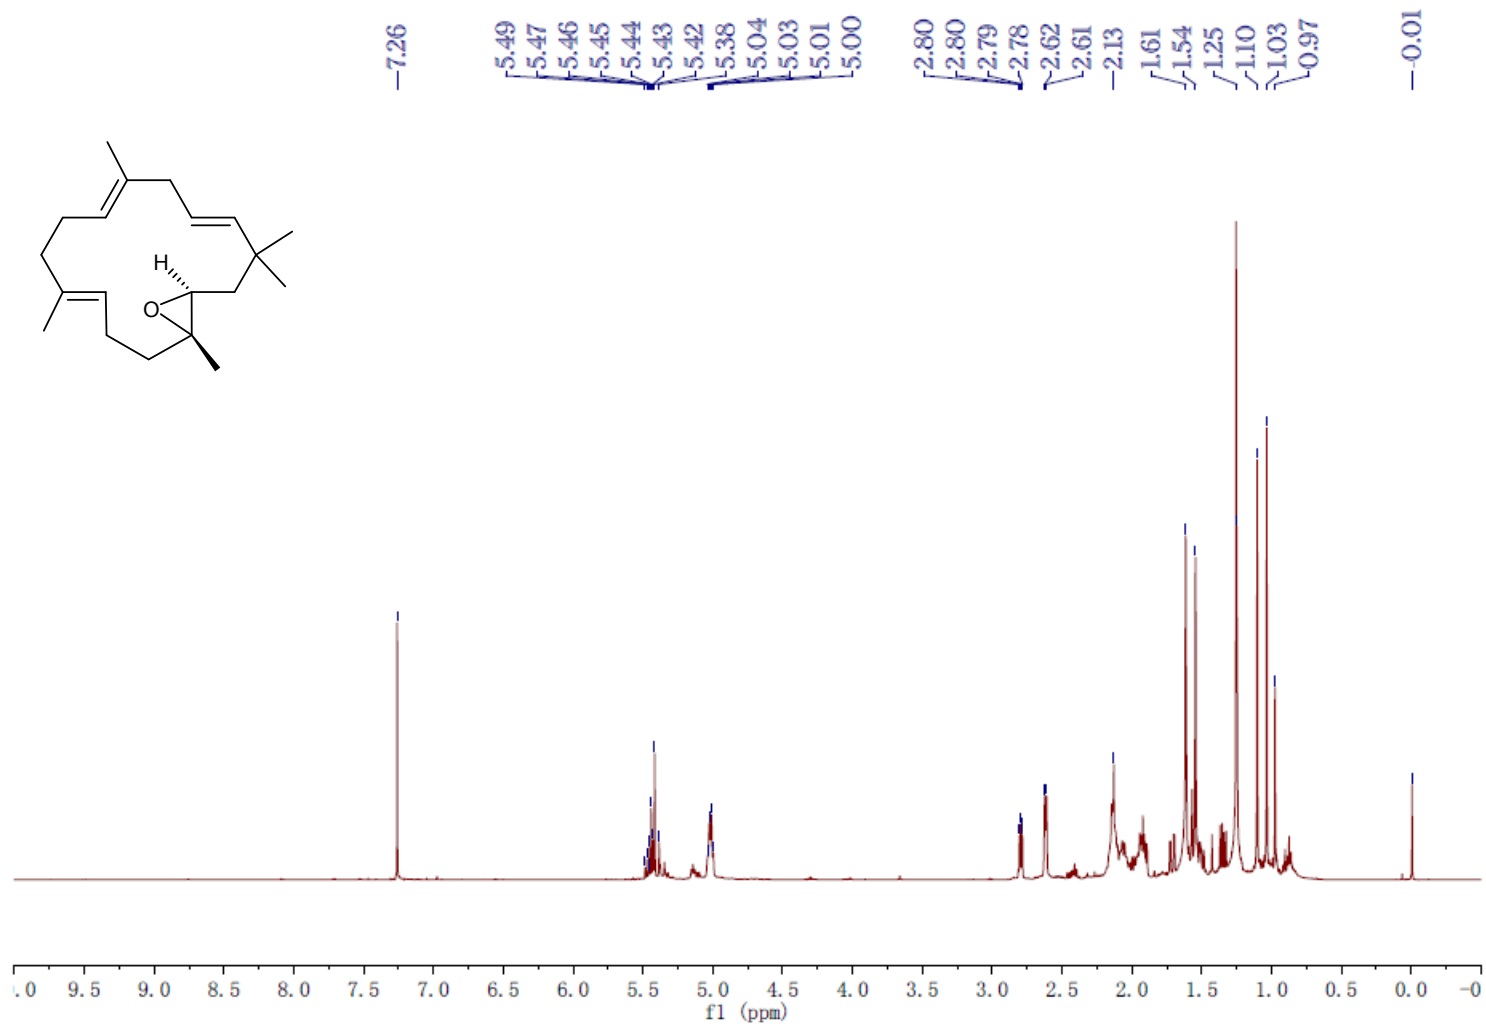

**Figure S26.** <sup>13</sup>C NMR spectrum (100 MHz, CDCl<sub>3</sub>) of epoxyflexibilene (7)

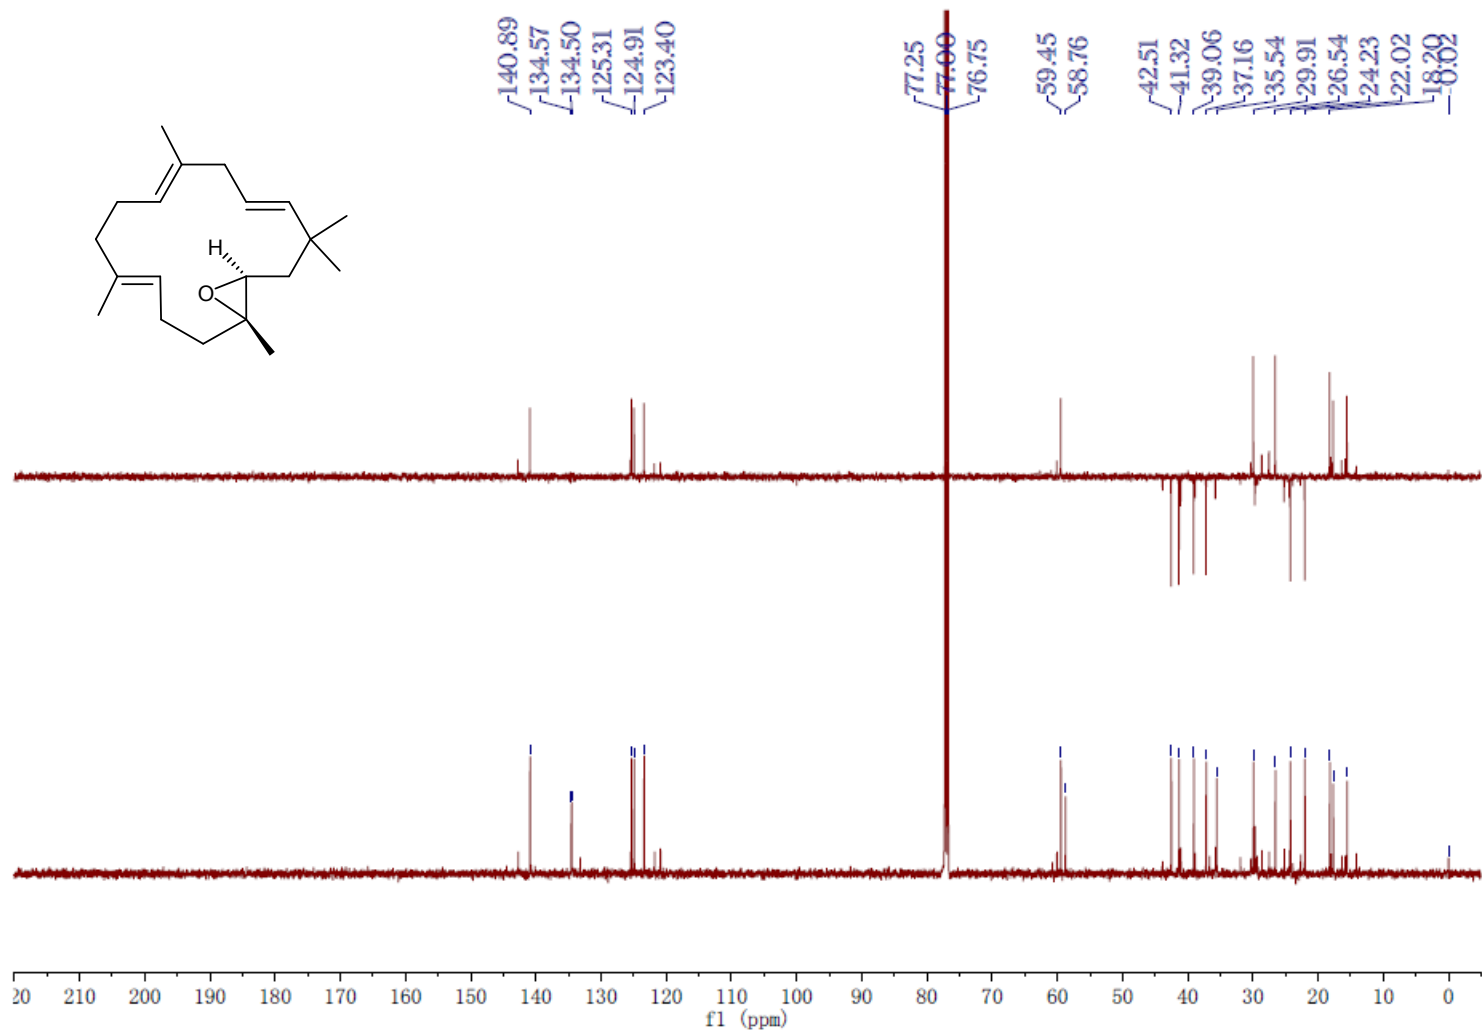

**Figure S27.** HMQC spectrum (400 MHz, CDCl<sub>3</sub>) of epoxyflexibilene (7)

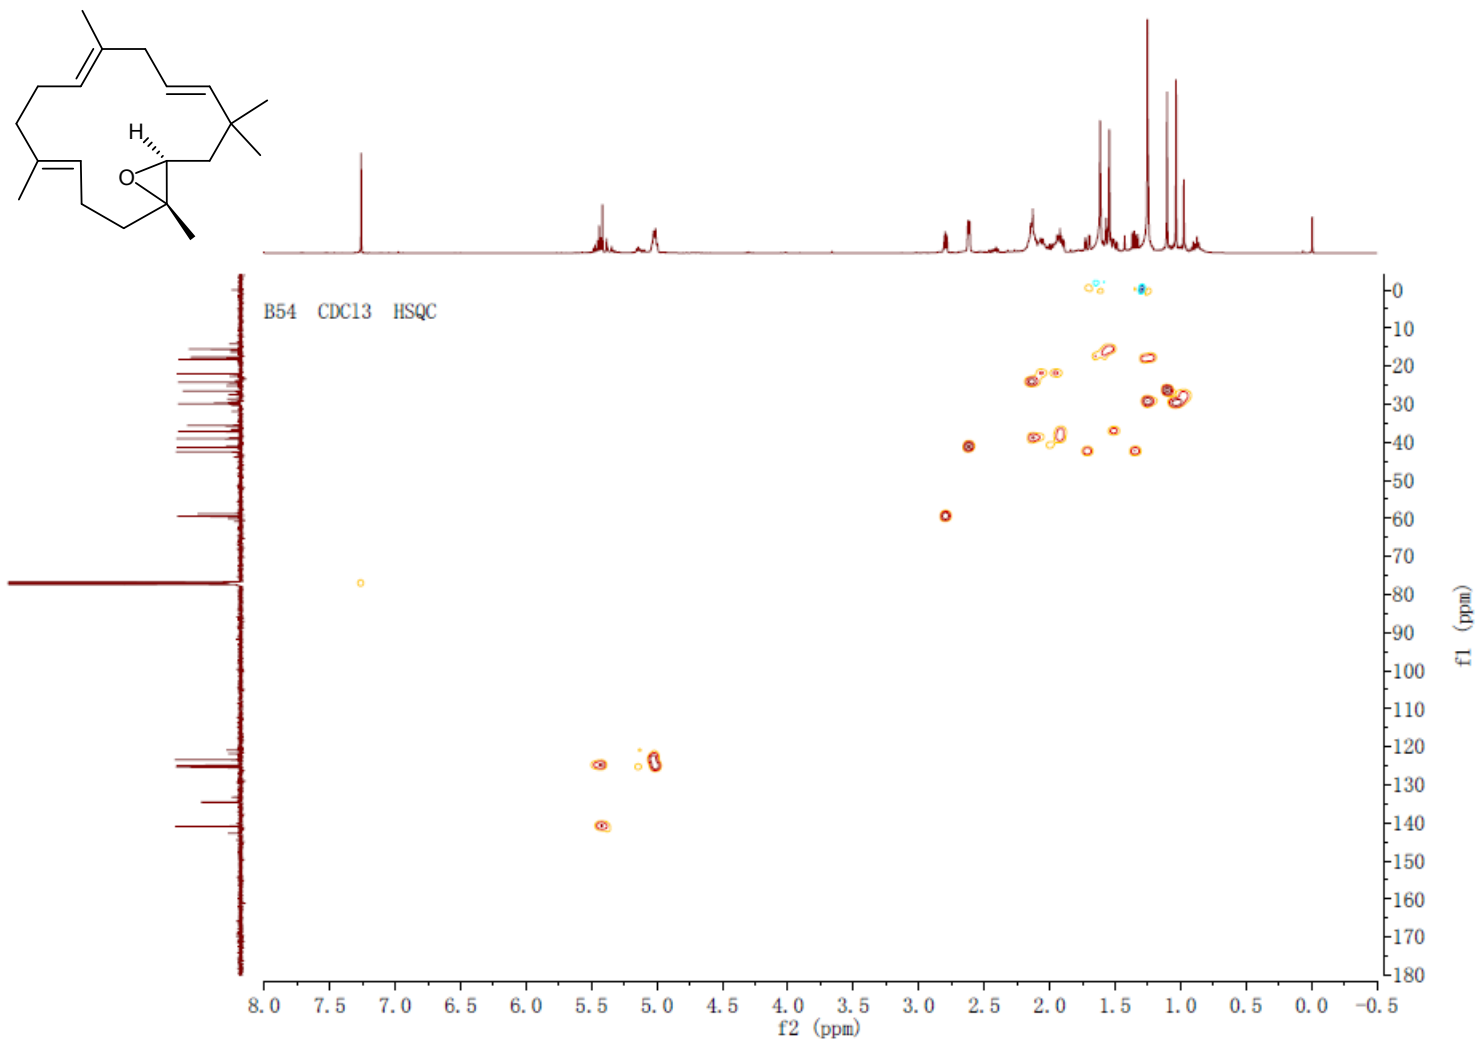

**Figure S28.** HMBC spectrum (400 MHz, CDCl<sub>3</sub>) of epoxyflexibilene (7)

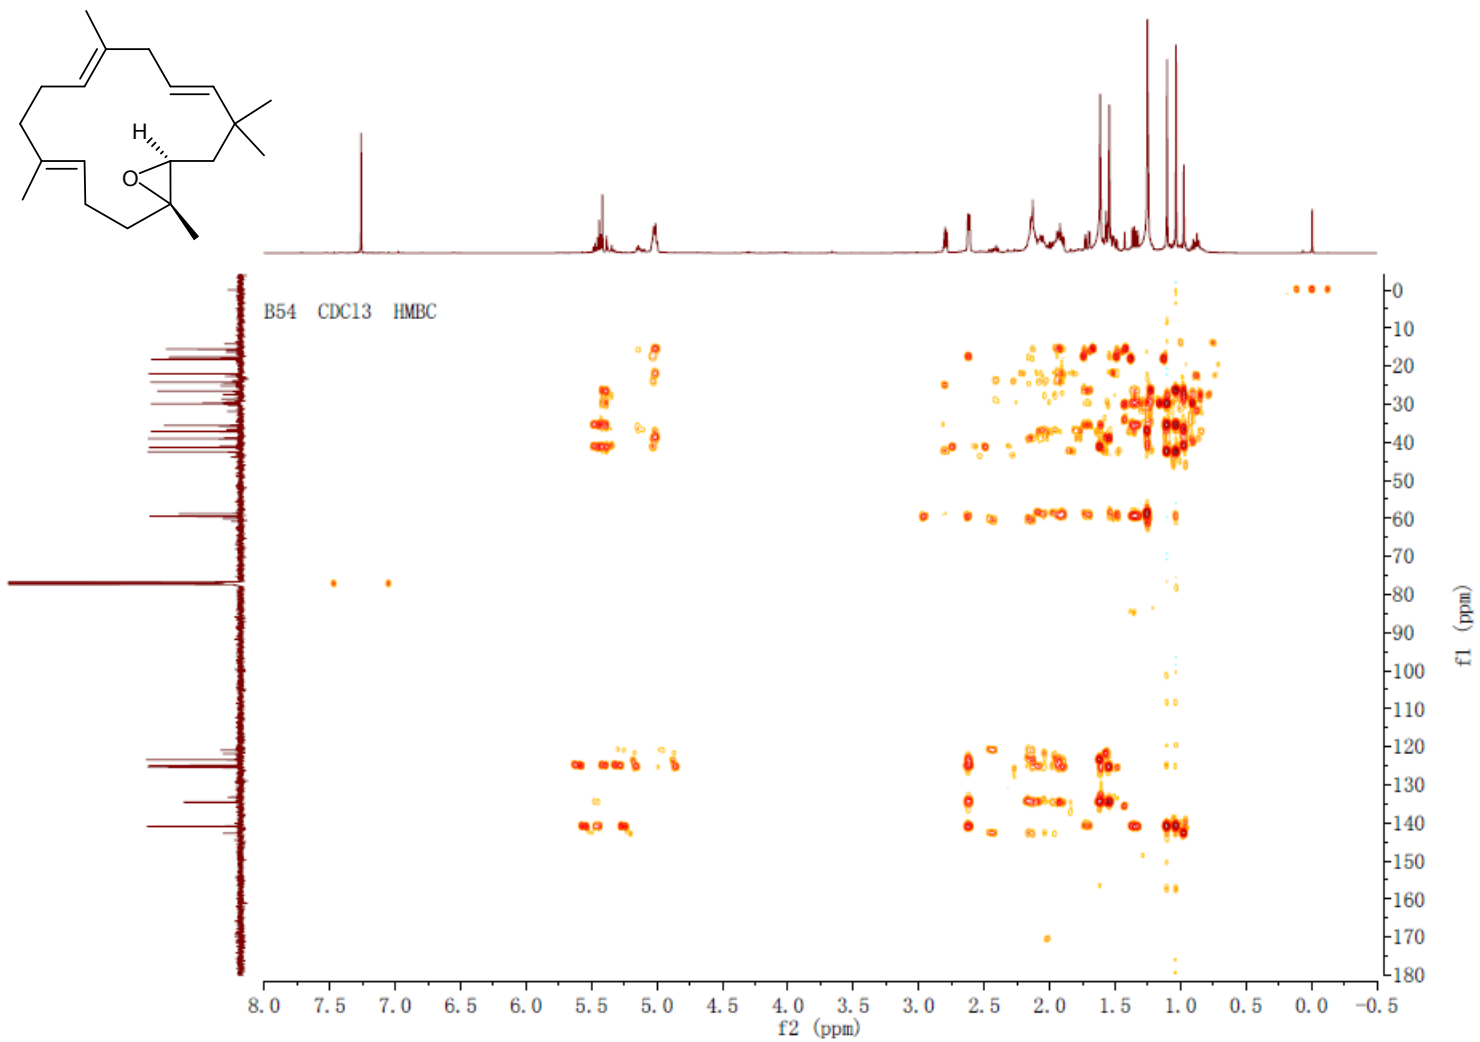

**Figure S29.**  $^1\text{H}$ - $^1\text{H}$  COSY spectrum (400 MHz,  $\text{CDCl}_3$ ) of epoxyflexibilene (7)



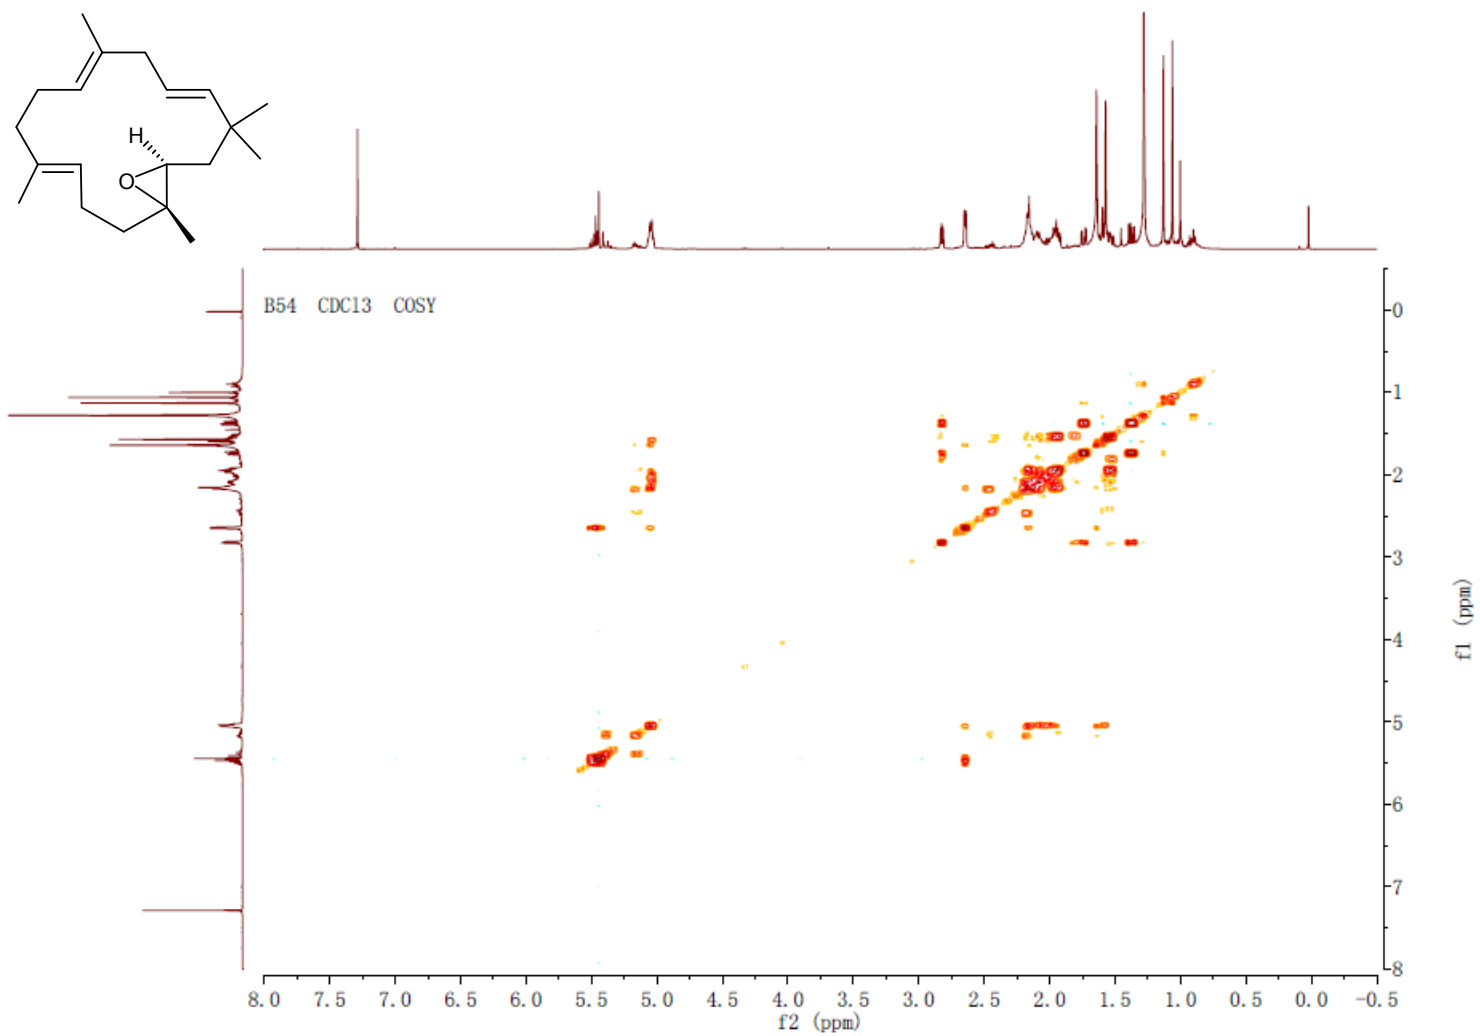

**Figure S30.** HREIMS spectrum of epoxyflexibilene (7)

SPEC: h120684-c1                      20-Jul-12    Elapse: 04:30.2    21  
Samp: B54                                              Start : 14:01:24    23  
Comm: Finnigan/MAT95//70eV/Tsou:220c/R:10000  
Mode: EI +VE +LMR BSCAN (EXP) UP HR NRM            Study : S/N: PT200712-01-01  
Oper: WANG\_J@SIMM.CAS                              Inlet :  
Base: 93.1                                            Inten : 937324            Masses: 50 > 800  
Norm: 93.1                                          RIC : 29253695            #peaks: 1540  
Peak: 1000.00 mmu  
Data: CMASS : converted

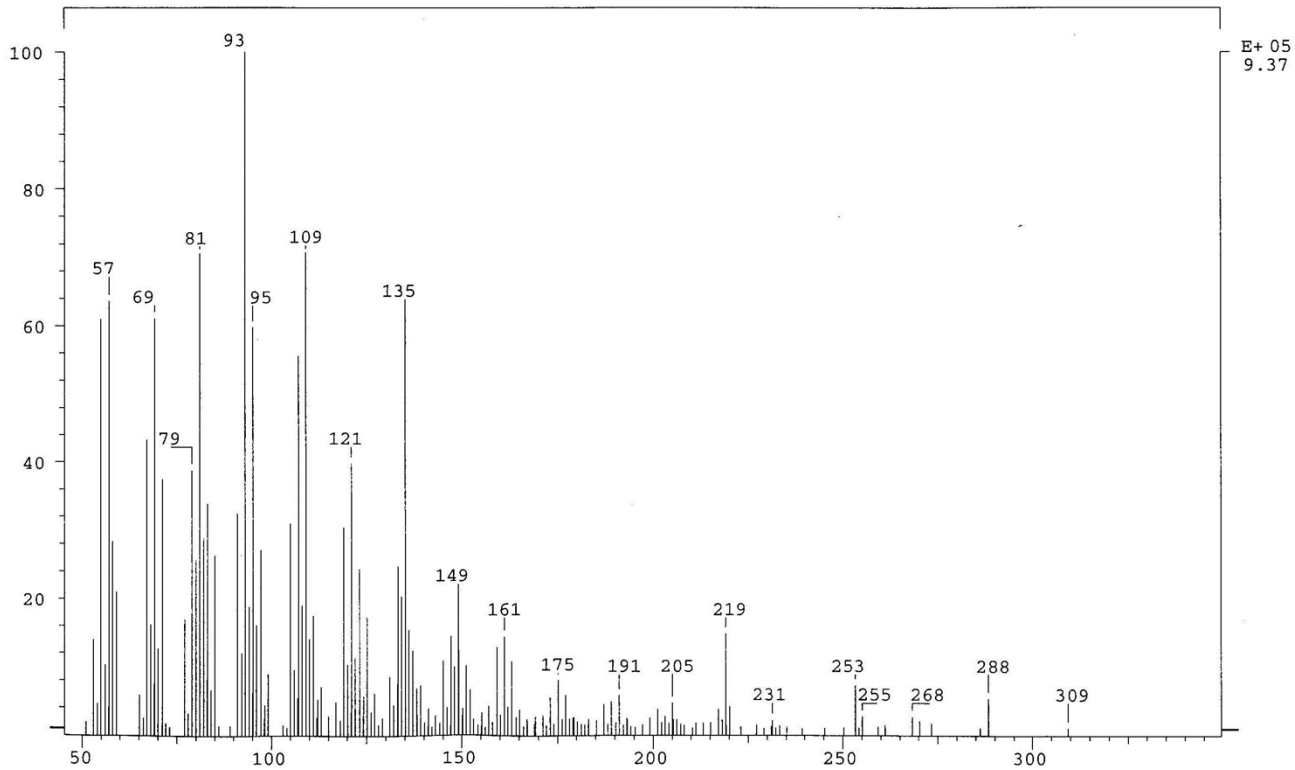

LIST: h120684-c1 20-Jul-12 Elapse: 03:28.9 16  
 Samp: B54 Start : 14:01:24 23  
 Comm: Finnigan/MAT95//70eV/Tsou:220c/R:10000  
 Mode: EI +VE +LMR BSCAN (EXP) UP HR NRM Study : S/N: PT200712-01-01  
 Oper: WANG\_J@SIMM.CAS Inlet :  
 Limit: ( 0 )  
 : ( 369 ) C21.H100.0  
 Peak: 1000.00 mmu R+D: -2.0 > 60.0  
 Data: CMASS : converted

| Mass     | Intensity | %RA    | %RIC | Delta | R+D | Composition |
|----------|-----------|--------|------|-------|-----|-------------|
| 71.07406 | * 208064  | 9.93   | 0.55 |       |     |             |
| 77.00519 | * 344109  | 16.42  | 0.91 | -2.5  | 5.5 | C5.H.O      |
| 79.01825 | * 706990  | 33.74  | 1.87 | 0.1   | 4.5 | C5.H3.O     |
| 80.02357 | * 607062  | 28.97  | 1.60 | 2.6   | 4.0 | C5.H4.O     |
| 81.03134 | * 1229042 | 58.66  | 3.25 | 2.7   | 3.5 | C5.H5.O     |
| 82.04390 | * 414558  | 19.79  | 1.09 | -2.0  | 3.0 | C5.H6.O     |
| 83.02024 | * 97072   | 4.63   | 0.26 |       |     |             |
| 83.05672 | * 323124  | 15.42  | 0.85 |       |     |             |
| 85.04997 | * 149535  | 7.14   | 0.39 |       |     |             |
| 85.08075 | * 118914  | 5.68   | 0.31 |       |     |             |
| 91.05135 | * 528476  | 25.22  | 1.40 |       |     |             |
| 92.06045 | * 280654  | 13.40  | 0.74 | 2.2   | 4.0 | C7.H8       |
| 93.06998 | * 2095203 | 100.00 | 5.53 | 0.4   | 3.5 | C7.H9       |
| 94.07740 | * 378798  | 18.08  | 1.00 | 0.9   | 3.0 | C7.H10      |
| 95.08729 | * 949957  | 45.34  | 2.51 | -1.2  | 2.5 | C7.H11      |
| 96.05934 | * 143325  | 6.84   | 0.38 | -1.8  | 3.0 | C6.H8.O     |
| 96.09433 | * 200355  | 9.56   | 0.53 | -0.4  | 2.0 | C7.H12      |
| 97.06630 | * 122054  | 5.83   | 0.32 | -1.0  | 2.5 | C6.H9.O     |
| 97.10271 | * 170591  | 8.14   | 0.45 | -1.0  | 1.5 | C7.H13      |
| 105.0341 | * 517198  | 24.68  | 1.37 | 0.0   | 5.5 | C7.H5.O     |
| 106.0372 | * 141754  | 6.77   | 0.37 |       |     |             |
| 107.0435 | * 931328  | 44.45  | 2.46 |       |     |             |
| 108.0482 | * 312346  | 14.91  | 0.82 |       |     |             |
| 109.0204 | * 206493  | 9.86   | 0.55 |       |     |             |
| 109.0566 | * 1316622 | 62.84  | 3.48 |       |     |             |
| 110.0277 | * 82940   | 3.96   | 0.22 |       |     |             |
| 110.0628 | * 237542  | 11.34  | 0.63 |       |     |             |
| 111.0375 | * 169235  | 8.08   | 0.45 |       |     |             |
| 111.0735 | * 122982  | 5.87   | 0.32 |       |     |             |
| 119.0869 | * 467091  | 22.29  | 1.23 | -0.8  | 4.5 | C9.H11      |
| 120.0929 | * 170020  | 8.11   | 0.45 | 1.0   | 4.0 | C9.H12      |
| 121.1021 | * 802564  | 38.30  | 2.12 | -0.4  | 3.5 | C9.H13      |
| 122.1075 | * 224909  | 10.73  | 0.59 | 2.0   | 3.0 | C9.H14      |
| 123.0805 | * 163810  | 7.82   | 0.43 | 0.5   | 3.5 | C8.H11.O    |
| 123.1168 | * 285508  | 13.63  | 0.75 | 0.6   | 2.5 | C9.H15      |
| 125.0962 | * 318056  | 15.18  | 0.84 | 0.4   | 2.5 | C8.H13.O    |
| 133.1021 | * 358170  | 17.09  | 0.95 | -0.3  | 4.5 | C10.H13     |
| 134.1091 | * 339897  | 16.22  | 0.90 | 0.5   | 4.0 | C10.H14     |
| 135.1172 | * 1222404 | 58.34  | 3.23 | 0.2   | 3.5 | C10.H15     |
| 136.1230 | * 304566  | 14.54  | 0.80 | 2.2   | 3.0 | C10.H16     |
| 137.0966 | * 173374  | 8.27   | 0.46 | 0.0   | 3.5 | C9.H13.O    |
| 137.1319 | * 153246  | 7.31   | 0.40 | 1.1   | 2.5 | C10.H17     |
| 138.1042 | * 134902  | 6.44   | 0.36 | 0.3   | 3.0 | C9.H14.O    |
| 139.1121 | * 122126  | 5.83   | 0.32 | 0.2   | 2.5 | C9.H15.O    |
| 145.1009 | * 120413  | 5.75   | 0.32 | 0.8   | 5.5 | C11.H13     |
| 147.1162 | * 232974  | 11.12  | 0.62 | 1.2   | 4.5 | C11.H15     |
| 148.1229 | * 184938  | 8.83   | 0.49 | 2.3   | 4.0 | C11.H16     |
| 149.0226 | * 110277  | 5.26   | 0.29 |       |     |             |
| 149.1311 | * 159170  | 7.60   | 0.42 | 2.0   | 3.5 | C11.H17     |
| 151.1116 | * 139970  | 6.68   | 0.37 | 0.7   | 3.5 | C10.H15.O   |
| 152.1178 | * 105566  | 5.04   | 0.28 | 2.3   | 3.0 | C10.H16.O   |
| 159.1165 | * 135830  | 6.48   | 0.36 | 0.9   | 5.5 | C12.H15     |
| 161.1320 | * 245037  | 11.70  | 0.65 | 1.0   | 4.5 | C12.H17     |
| 163.1477 | * 91434   | 4.36   | 0.24 | 1.0   | 3.5 | C12.H19     |
| 175.1477 | * 109635  | 5.23   | 0.29 | 1.0   | 4.5 | C13.H19     |
| 219.1752 | * 142183  | 6.79   | 0.38 | -0.3  | 4.5 | C15.H23.O   |
| 288.2466 | * 92861   | 4.43   | 0.25 | -1.3  | 5.0 | C20.H32.O   |

**Figure S31.**  $^1\text{H}$  NMR spectrum (400 MHz, Pyr- $d_5$ ) of sinulaflexiolide L (**8**)

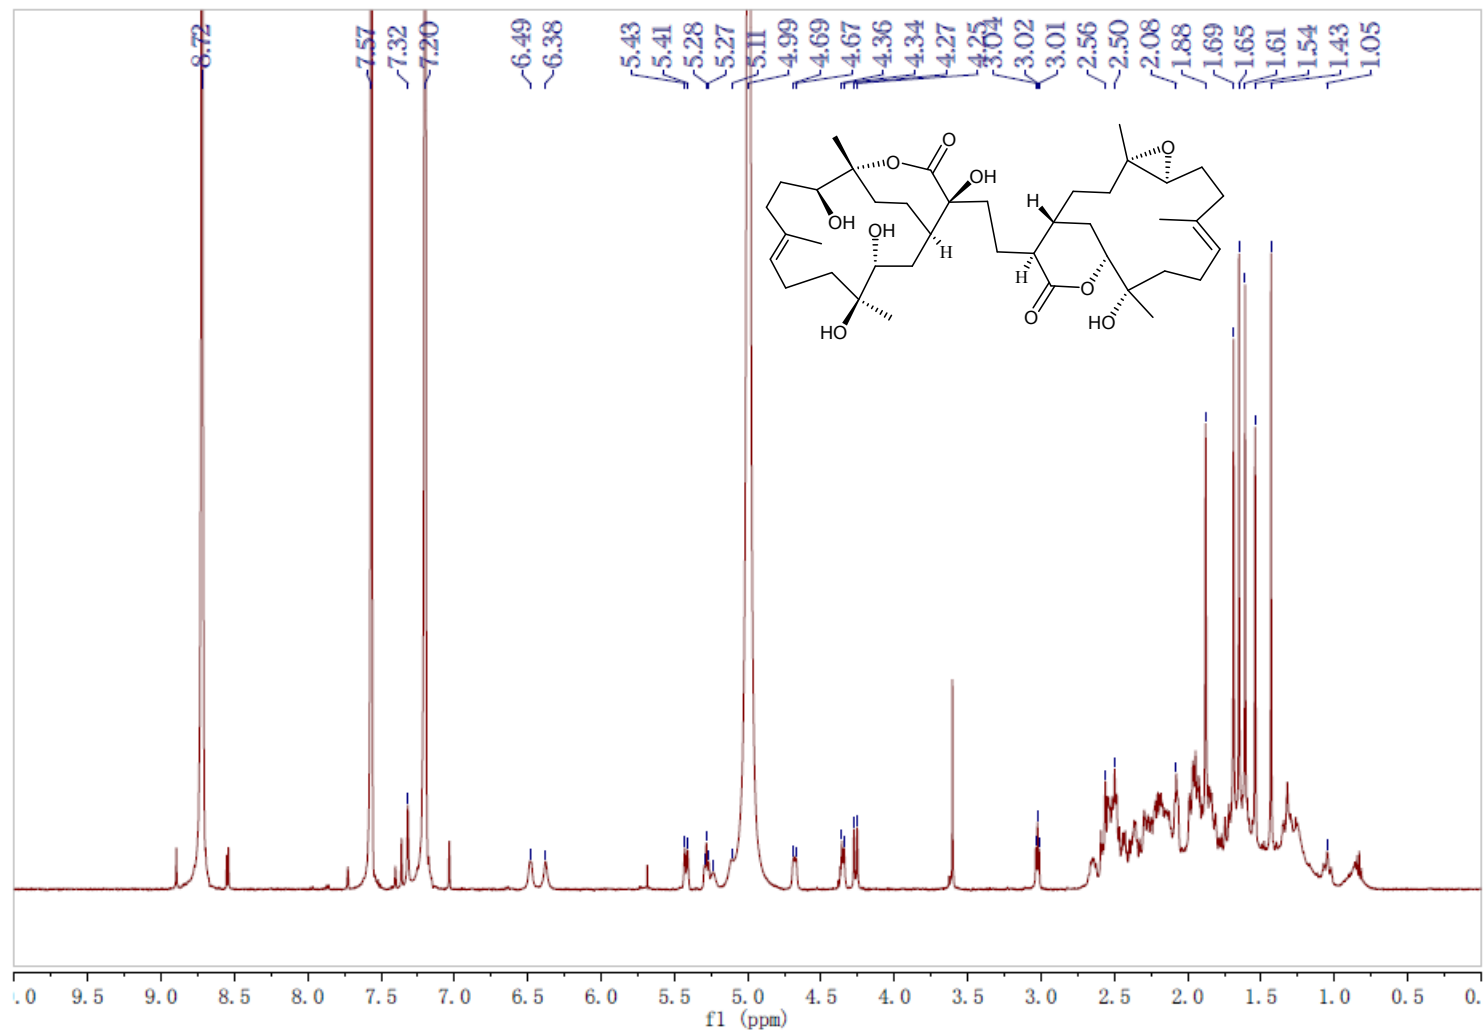

**Figure S32.**  $^{13}\text{C}$  NMR spectrum (100 MHz, Pyr- $\text{d}_5$ ) of simulaflexiolide L (**8**)

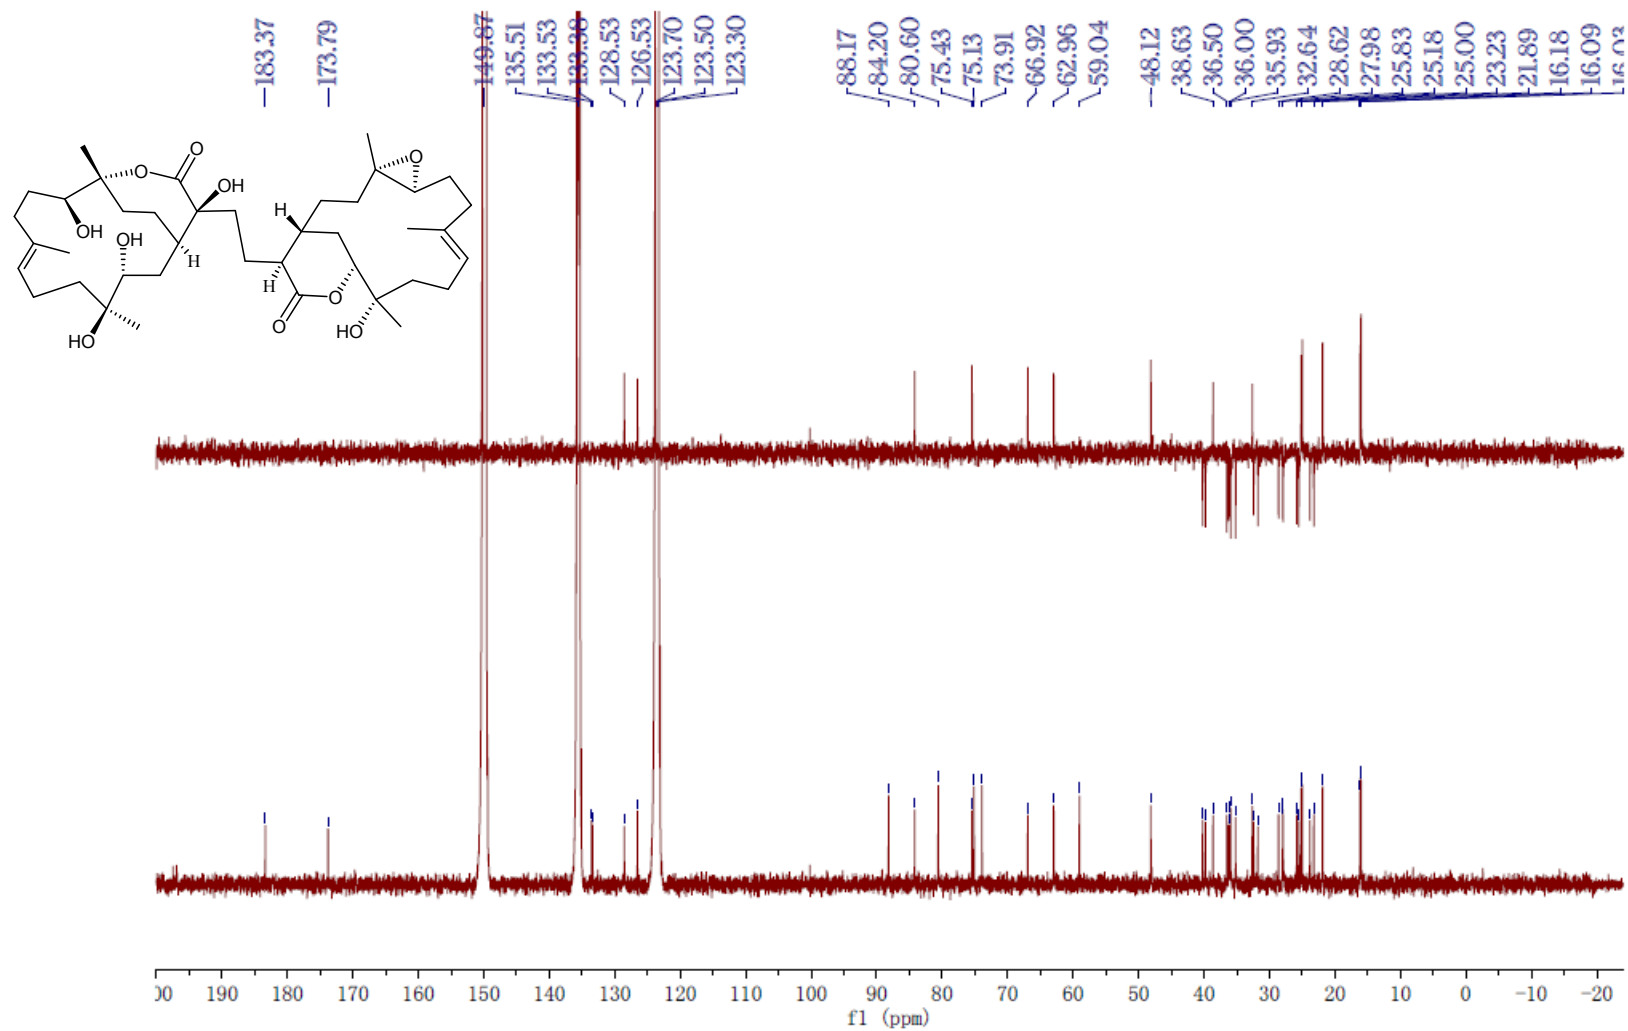

**Figure S33.** HMQC spectrum (400 MHz, Pyr-d<sub>5</sub>) of sinulaflexiolide L (**8**)

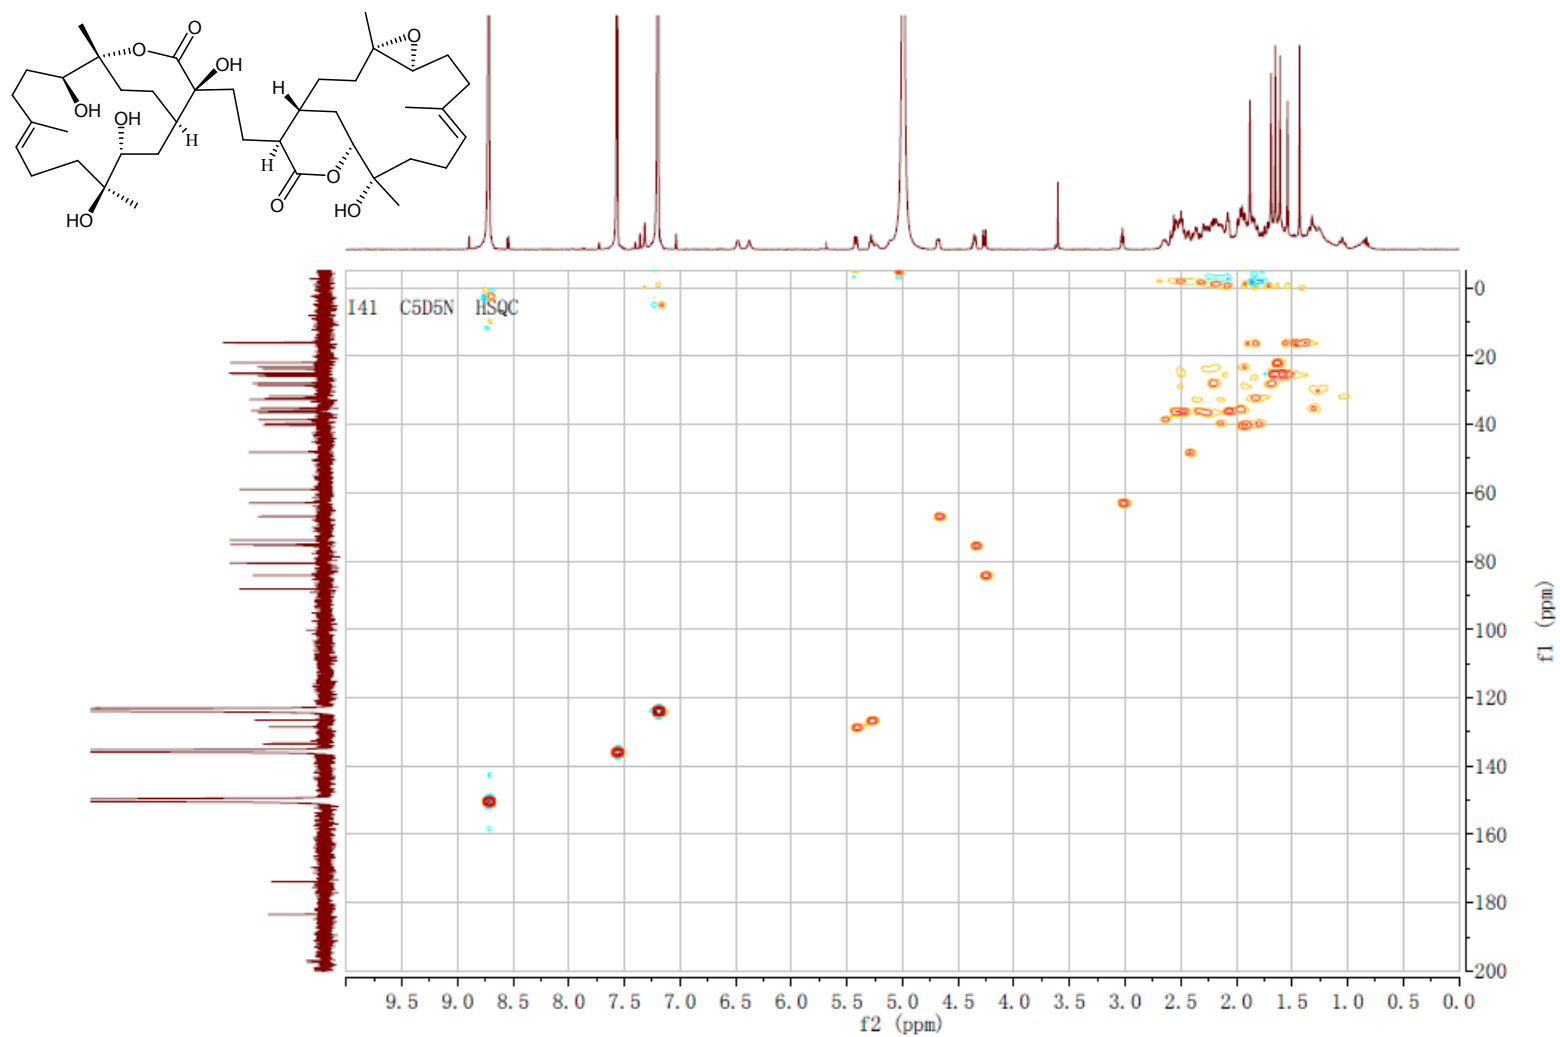

**Figure S34.** HMBC spectrum (400 MHz, Pyr-d<sub>5</sub>) of sinulaflexiolide L (**8**)

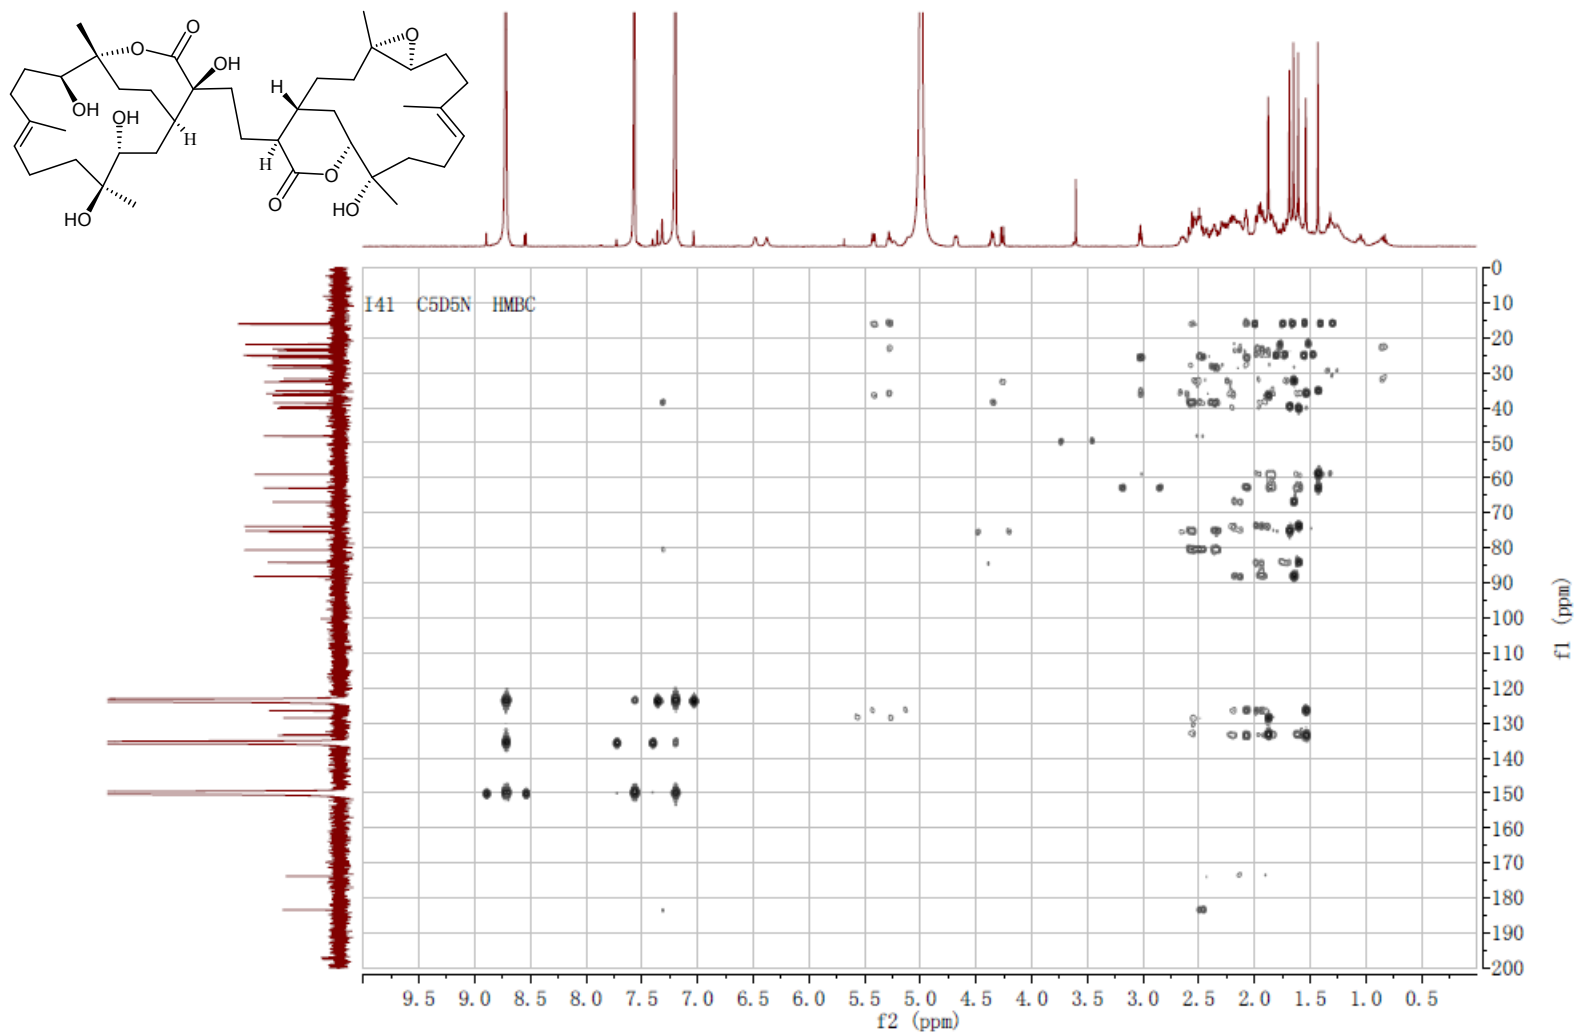

**Figure S35.**  $^1\text{H}$ - $^1\text{H}$  COSY spectrum (400 MHz, Pyr- $\text{d}_5$ ) of sinulaflexiolide L (**8**)

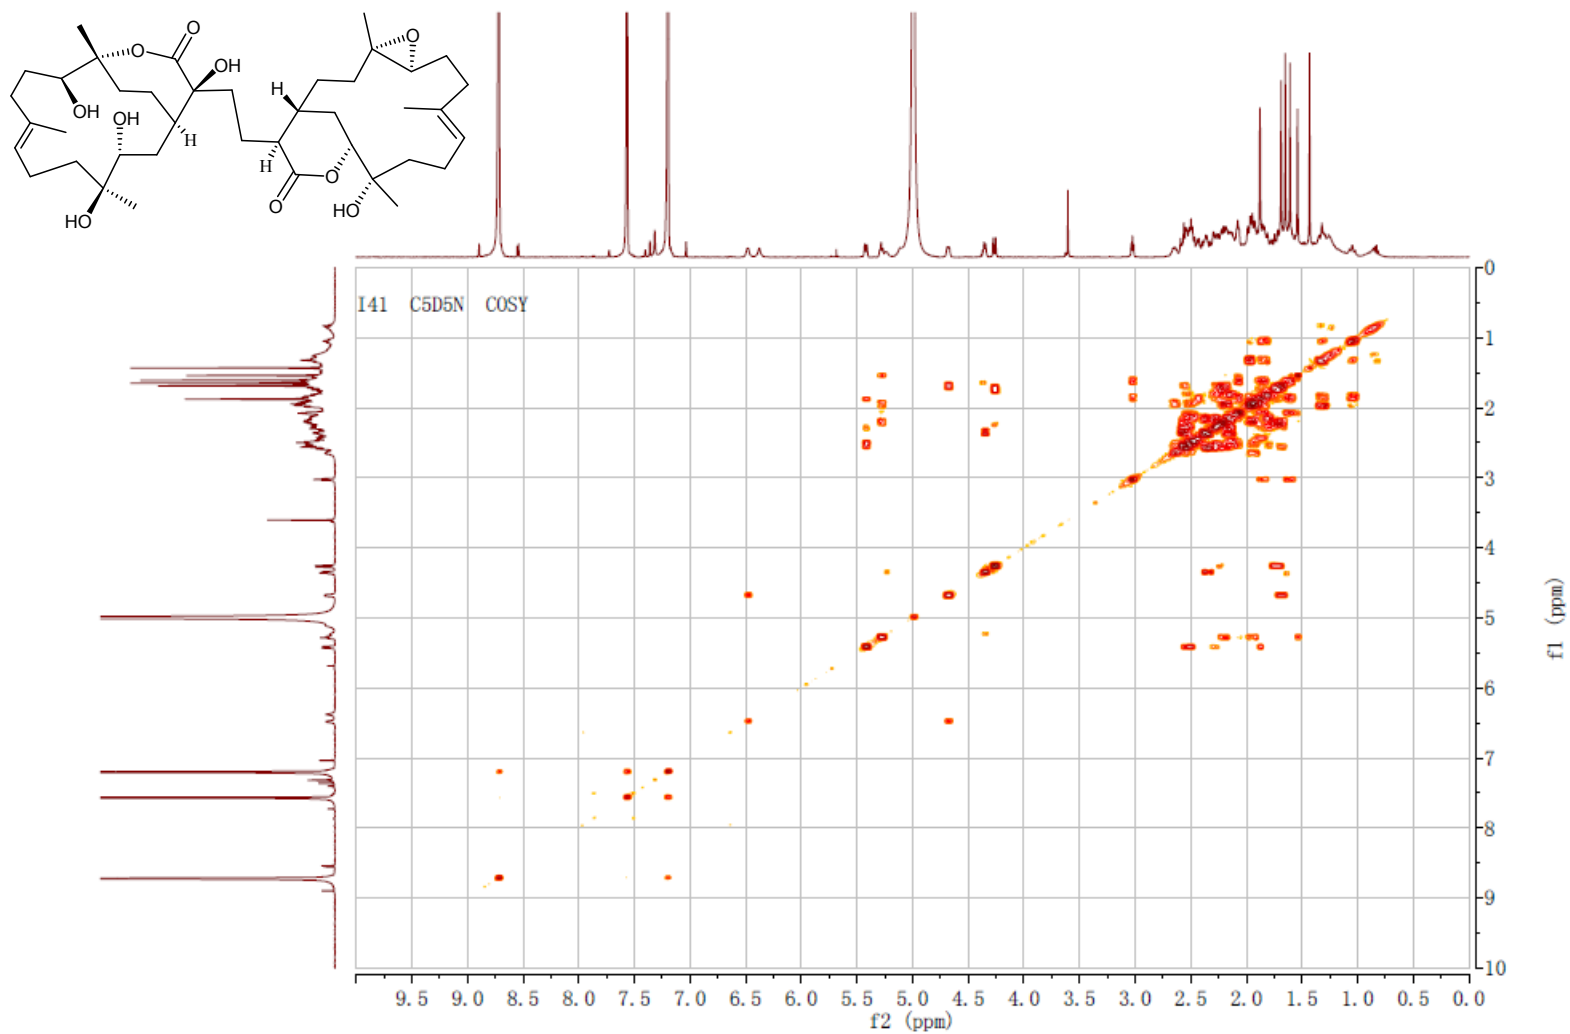



**Figure S36.** HRESIMS spectrum of sinulaflexiolide L (**8**)

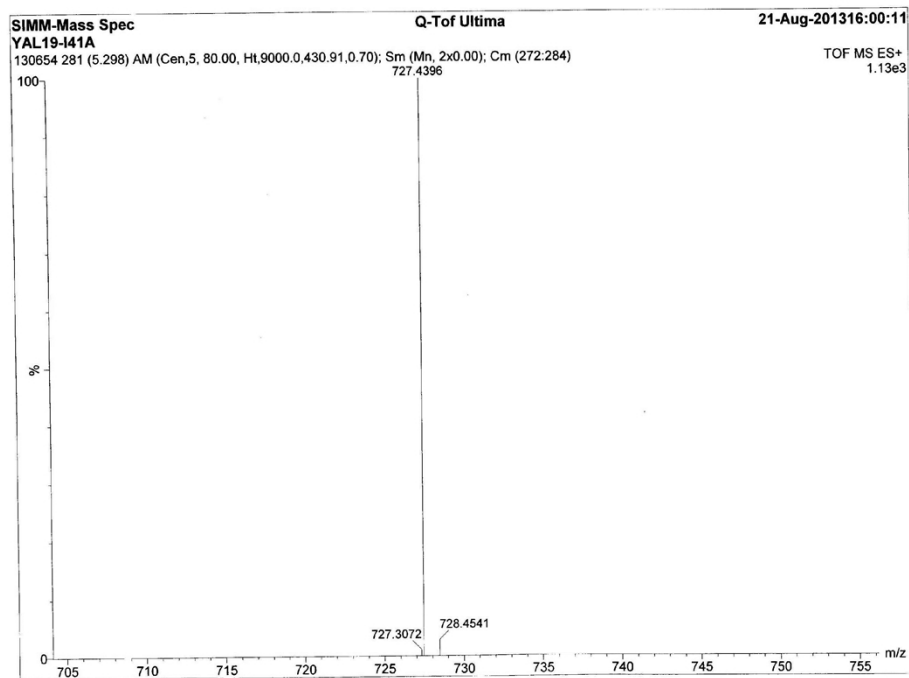

**Elemental Composition Report**

**Page 1**

Tolerance = 10.0 PPM / DBE: min = -1.5, max = 50.0  
 Isotope cluster parameters: Separation = 1.0 Abundance = 1.0%

Monoisotopic Mass, Odd and Even Electron Ions  
 20 formula(e) evaluated with 1 results within limits (up to 20 closest results for each mass)

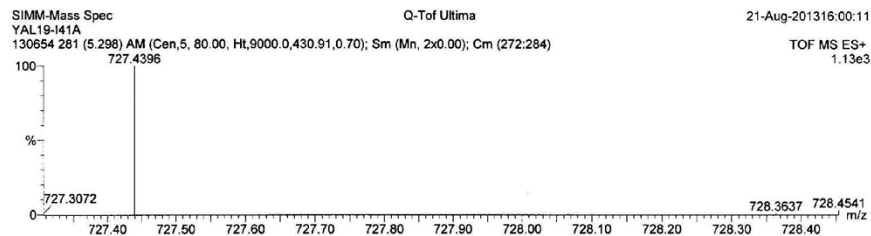

| Mass     | RA     | Calc. Mass | mDa  | PPM  | DBE | Score | Formula        |
|----------|--------|------------|------|------|-----|-------|----------------|
| 727.4396 | 100.00 | 727.4397   | -0.1 | -0.2 | 8.5 | 1     | C40 H64 O10 Na |
